# Supplementary material for: Systematic Review of the Therapeutic Role of Apoptotic Inhibitors in Neurodegeneration and Their Potential Use in Schizophrenia
Source: MDPI journal article supplement (doi:10.3390/antiox11112275), 2022-11-17
Supplement: s1 [file s1]

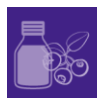

## Supplementary Material

**Supplementary Figure S1.** Flow chart of the studies included in this review.

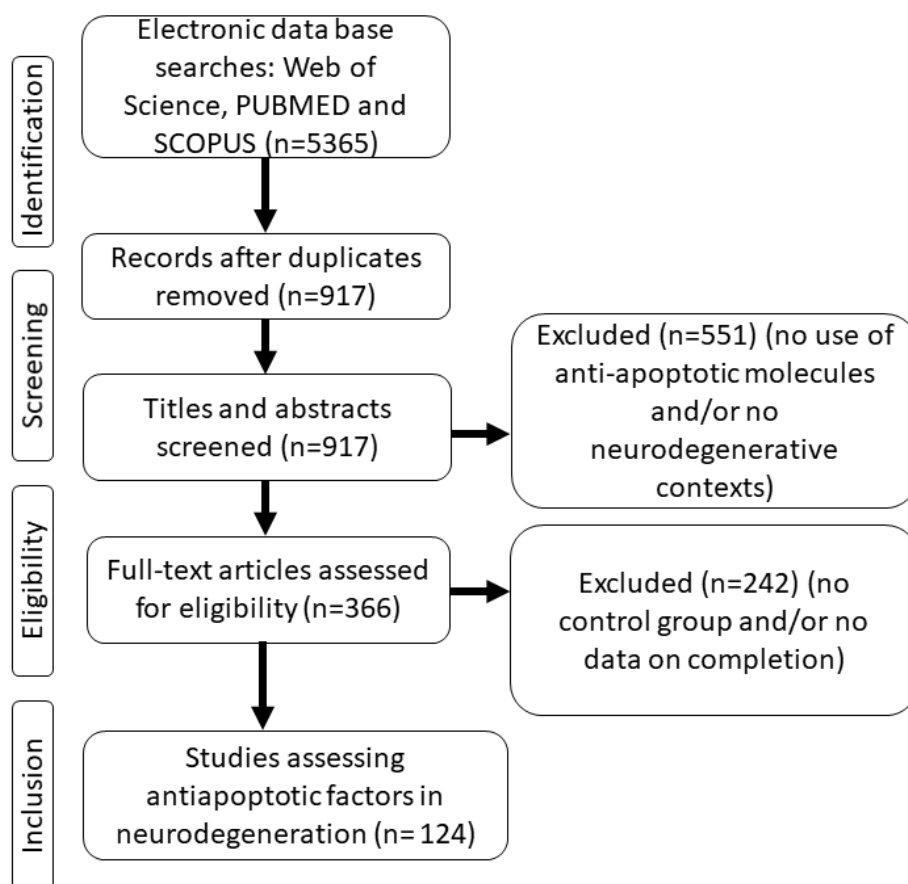

**Supplementary Table S1.** In vitro and in vivo models using Bax-/Bax- genetic manipulation, underpinning the relevance of mitochondrial apoptotic targets in the therapeutic approaches for neurodegeneration.

| <b>Bax-/bax- in vitro and in vivo models</b> |                                                     |                                                                                                                                                                |                  |
|----------------------------------------------|-----------------------------------------------------|----------------------------------------------------------------------------------------------------------------------------------------------------------------|------------------|
| <b>Pathology</b>                             | <b>Model</b>                                        | <b>Conclusions</b>                                                                                                                                             | <b>Reference</b> |
| Neurodegeneration                            | Knockout mice                                       | A significant reduction of astrocyte density is observed in the hippocampus of Bax knockout mice                                                               | [1]              |
| Neurodegeneration (excitotoxicity)           | Oxygen/glucose deprivation in Bax-deficient neurons | The ability of Bax to support dynamic ER Ca <sup>2+</sup> handling is critical for cell death signaling during periods of neuronal overexcitation              | [2]              |
| Unfolded protein response                    | ER stress induced in neurons                        | ER stress commits neurons to die before cytochrome c release and this commitment requires Bax activation and c-jun N-terminal kinase signaling                 | [3]              |
| Neurodegeneration                            | Apoptosis induced in sympathetic neurons            | Puma provides a critical link between p53 and Bax, and is both necessary and sufficient to mediate DNA damage-induced apoptosis of sympathetic neurons         | [4]              |
| Parkinson's disease                          | MPTP mice                                           | Mutant mice lacking Bax are significantly more resistant to MPTP than their wild-type littermates                                                              | [5]              |
| Neurodegeneration                            | Radiation induced in hippocampal neurons            | P53 and Bax are necessary for radiation-induced cell death in postnatal cultured hippocampal neuron (caspase-independent manner)                               | [6]              |
| Neurodegeneration                            | Apoptosis induced in cerebellar granule cells       | Bax deleted granule cells do not undergo apoptosis (during potassium induction), yet do undergo an excitotoxic cell death in response to stimulation with NMDA | [7]              |
| Neurodegeneration                            | Trophic factor deprivation                          | Bax-deficient superior cervical ganglia and facial nuclei possess increased numbers of neurons                                                                 | [8]              |

ER, endoplasmic reticulum; MPTP, 1-methyl-4-phenyl-1,2,3,6-tetrahydropyridine; NMDA, N-Methyl-D-Aspartate; SOD, superoxide dismutase.

**Supplementary Table S2.** Number of studies using apoptotic inhibitors in the classic neurodegenerative disorders including AD, HD and PD vs. SZ.

| MOLECULE                           | CAS No.      | Target/action                 | TNS  | TNS AD | TNS HD | TNS PD | TNS SZ |
|------------------------------------|--------------|-------------------------------|------|--------|--------|--------|--------|
| Ac-DEVD-CHO                        | 169332-60-9  | Caspase-3                     | 53   | 1      | 2      | 9      | 0      |
| Ac-FLTD-CMK                        | 2376255-48-8 | Caspase-5, -11                | 1    | 0      | 0      | 0      | 0      |
| Aristolactam I                     | 13395-02-3   | Caspase-3                     | 56   | 1      | 0      | 0      | 0      |
| Asperosaponin VI                   | 39524-08-8   | Caspase-3                     | 68   | 1      | 0      | 0      | 0      |
| Belnacasan (VX-765)                | 273404-37-8  | Caspase-1, -4                 | 8    | 3      | 0      | 1      | 0      |
| Biotin-VAD-FMK                     | 1135688-15-1 | Pan caspase                   | 1    | 1      | 0      | 0      | 0      |
| BOC-D-FMK                          | 634911-80-1  | Pan caspase                   | 81   | 1      | 1      | 1      | 0      |
| Chelidonic acid                    | 99-32-1      | NF-κB, Caspase-1              | 26   | 1      | 0      | 0      | 0      |
| Crustecdysone (20-Hydroxyecdysone) | 5289-74-7    | Pan caspase                   | 1839 | 1      | 3      | 7      | 0      |
| Duocarmycin A                      | 118292-34-5  | Caspase-3, -9                 | 85   | 1      | 0      | 0      | 0      |
| Emricasan (PF 03491390)            | 254750-02-2  | Pan caspase                   | 54   | 1      | 0      | 1      | 0      |
| EP1013                             | 223568-55-6  | Pan caspase                   | 28   | 1      | 0      | 1      | 0      |
| Ivachtin                           | 745046-84-8  | Caspase-3                     | 477  | 1      | 0      | 0      | 0      |
| ML132 (NCGC 00185682)              | 1230628-71-3 | Caspase-1                     | 4    | 1      | 0      | 1      | 0      |
| Ossirene                           | 106566-58-9  | Caspase-1                     | 1    | 1      | 0      | 0      | 0      |
| Paris saponin VII                  | 68124-04-9   | Caspase-3, -9 and Bcl-2       | 19   | 1      | 0      | 0      | 0      |
| Penicillic acid                    | 90-65-3      | Fas ligand, Caspase-8         | 271  | 1      | 0      | 0      | 0      |
| Pralnacasan                        | 192755-52-5  | Caspase-1                     | 19   | 1      | 0      | 0      | 0      |
| Q-VD-OPh                           | 1135695-98-5 | Pan caspase                   | 144  | 4      | 1      | 1      | 0      |
| Senkyunolide I                     | 94596-28-8   | Caspase-3                     | 93   | 1      | 0      | 0      | 0      |
| Sesamolol                          | 526-07-8     | JNK, p38, MAPKs and caspase-3 | 108  | 1      | 0      | 1      | 0      |
| Tauroursodeoxycholate              | 14605-22-2   | Caspase-3, -12                | 1036 | 1      | 0      | 20     | 0      |
| Tauroursodeoxycholate Sodium       | 35807-85-3   | Caspase-3, -12                | *90  | 1      | 0      | 1      | 0      |
| Thevetiaflavone                    | 29376-68-9   | Bcl-2, Bax and Caspase-3      | 4    | 1      | 0      | 0      | 0      |
| Wedelolactone                      | 524-12-9     | Caspase-11                    | 164  | 1      | 0      | 1      | 0      |
| Z-VAD(OMe)-FMK                     | 187389-52-2  | Pan caspase                   | 61   | 1      | 1      | 0      | 0      |
| Z-VAD-FMK                          | 161401-82-7  | Pan caspase                   | 3499 | 31     | 10     | 27     | 0      |
| Z-DEVD-FMK                         | 210344-95-9  | Caspase-3                     | 755  | 21     | 4      | 13     | 0      |
| Z-LEHD-FMK                         | 210345-04-3  | Caspase-9                     | 283  | 1      | 0      | 2      | 0      |
| Z-IETD-FMK                         | 210344-98-2  | Caspase-8                     | 353  | 1      | 0      | 1      | 0      |
| Z-YVAD-FMK                         | 210344-97-1  | Pan caspase                   | 68   | 1      | 0      | 0      | 0      |
| Z-WEHD-FMK                         | 210345-00-9  | Caspase-3, -12                | 7    | 1      | 0      | 2      | 0      |
| ZYZ-488                            | 1470302-79-4 | Caspase-3, -9                 | 2    | 1      | 0      | 0      | 0      |
| Z-Asp-CH2-DCB                      | 153088-73-4  | Pan caspase                   | 90   | 1      | 0      | 0      | 0      |
| Z-LEHD-FMK TFA                     | 524746-03-0  | Caspase-9                     | 3    | 1      | 0      | 0      | 0      |

TNS, Total number of studies; AD, Alzheimer's disease; HD, Huntington's disease; PD, Parkinson's disease; SZ, Schizophrenia.

NOTE: Etiopathogenic studies have been included. \*A clinical trial with anti-apoptotic sodium phenylbutyrate-aurursodiol has been recently conducted on amyotrophic lateral sclerosis leading to promising results in the slower functional decline of the patients (155.)

**Supplementary Table S3.** In vivo and in vitro approaches against apoptosis in several neurodegenerative experimental models.

| Disease                       | Model                         | Manipulation             | Pharmacological inhibition                                                                          | References |
|-------------------------------|-------------------------------|--------------------------|-----------------------------------------------------------------------------------------------------|------------|
| Alzheimer's disease           | A $\beta$ Hippocampal neurons | A $\beta$ aggregates     | Rhizolutin (caspase-3)                                                                              | [9]        |
|                               | Transgenic mice               | TgCRND8*                 | QVD-OPh (pan caspase)                                                                               | [10]       |
| Parkinson's disease           | Transgenic mice               | Bax knockout             | Pifithrin-alpha/Z-1-117 (p53)                                                                       | [11], [12] |
|                               |                               | Bcl-2 transgenic         | CEP-11004 (JNK)                                                                                     | [13]       |
|                               |                               | P53 knockout             | Minocycline (cyt C, caspase-1, -3)                                                                  | [14]       |
|                               | Induced mice                  | MPTP- and 6-OHDA-induced | Z-DIPD-FMK (caspase-3)                                                                              | [15]       |
|                               | Dopaminergic neurons          | Alpha-synuclein          | QVD-OPh, zVAD-FMK/M-920, zVDVAD-FMK (caspase-2), zDEVD-FMK/M-725 (caspase-3), zLEHD-FMK (caspase-9) | [16]       |
| Huntington's disease          | R6/2 transgenic mice          | Caspase-1 transgenic     | zVAD-FMK, minocycline (cyt c, caspase-1, -3)                                                        | [17]       |
|                               | BACHD transgenic mice         | BACHD transgenic         | ED11 (caspase-6)                                                                                    | [18]       |
| Amyotrophic lateral sclerosis | SOD1 transgenic mice          | Bcl-2 transgenic         | zVAD-FMK                                                                                            | [19]       |
|                               |                               | Caspase-1 transgenic     | Minocycline (cyt C, caspase-1, -3)                                                                  | [20]       |
|                               |                               | G93A-SOD1                | JGK-263 (Glycogen synthase kinase-3 $\beta$ )*                                                      | [21]       |

6-OHDA, 6-hydroxydopamine; BACHD, bacterial artificial chromosome (BAC)-mediated transgenic mouse model; Cyt c, Cytochrome c; ED11 peptide (GRKKRRQRRPPQSSEIVLDGTDN); FasL, Fas Ligand; Glycogen synthase kinase-3 $\beta$  is a critical activator for neuronal apoptosis; JNK, JUN-N-terminal kinase; MPTP, 1-methyl-4-phenyl-1,2,3,6-tetrahydropyridine; QVD-OPh, quinolyl-valyl-O-methylaspartyl-[-2, 6-difluorophenoxy]-methyl ketone; SOD1, Superoxide dismutase; zDEVD-FMK, benzyloxycarbonyl-Asp(OMe)-Glu(OMe)-ValAsp(OMe)-fluoromethylketone; zLEHD-FMK, benzyloxycarbonyl-Leu-Glu(OMe)-His-Asp(OMe)-fluoromethylketone; zVAD-FMK, benzyloxycarbonyl-Val-Ala-Asp-fluoromethylketone; zVDVAD-FMK, benzyloxycarbonyl-Val-Asp-Val-Ala-Asp-fluoromethylketone

**Supplementary Table S4.** Mitochondrially-targeted drugs in neurodegenerative and other neurological disorders.

| Drug class (Compound)                            | Mechanism of action                                                                                                                                                                                    | Therapeutic outcomes                                                                  | References            |
|--------------------------------------------------|--------------------------------------------------------------------------------------------------------------------------------------------------------------------------------------------------------|---------------------------------------------------------------------------------------|-----------------------|
| a-Lipoic acid                                    | Scavenges the toxic by-products of lipid peroxidation                                                                                                                                                  | Antioxidant properties in AD                                                          | [22], [23]            |
| Carotenoid (Lycopene)                            | Suppress oxidative damage                                                                                                                                                                              | Antioxidant, anti-inflammatory, memory enhancing and neuroprotective activities in HD | [23], [24]            |
| Cholest-4-en-3-one                               | Scavenges the toxic by-products of lipid peroxidation                                                                                                                                                  | Effective in treating painful diabetic and chemotherapy-induced neuropathies          | [23]                  |
| Clozapine                                        | Improves function of mitochondria by altering mitochondrial membrane potential                                                                                                                         | Neuroprotective properties in SZ                                                      | [23], [25]            |
| Curcumin (volatile oil) (Curcuma longa)          | Suppress tumor necrotic factor (TNF) activity, formation of A $\beta$ plaques and protects brain cells from noxious agents                                                                             | Antioxidant, anti-inflammatory and amyloid disaggregating properties in AD            | [23], [24], [26]–[28] |
| Dichloroacetate                                  | Activates the pyruvate dehydrogenase complex and lower cerebral lactate amounts                                                                                                                        | Neuroprotective activity in HD                                                        | [23], [29]            |
| Disaccharide (Trehalose)                         | Inhibits amyloid formation, aggregation of $\beta$ -amyloid and autophagic activities against aggregation proteins (huntingtin)                                                                        | Neuroprotective properties in HD                                                      | [23], [24]            |
| Epigallocatechin-3-gallate (Camellia sinensis)   | Stabilize mitochondrial functions like ATP levels                                                                                                                                                      | Antioxidant properties in AD                                                          | [23], [24], [26]      |
| Ferulic acid (Smallanthus sonchifolius)          | Neuroprotective effect against oxidative stress and cell death induced by A $\beta$ 42 oligomers                                                                                                       | Antioxidant properties in AD                                                          | [23], [24], [26]      |
| Ginsenosides Rg1 and Rg3 (Ginseng)               | Suppress A $\beta$ induced neurotoxicity, A $\beta$ associated generation of ROS and cell death                                                                                                        | Neuroprotective effect in AD                                                          | [23], [24], [26]      |
| Melatonin                                        | Direct scavenger of many ROS species such as free radicals, peroxy nitrates, hydroxyls, peroxy radicals, and other nitrous oxides under normal conditions                                              | Antioxidant properties in PD                                                          | [30]                  |
| Mitoquinone                                      | Produces direct antioxidant action by scavenging peroxy radical, peroxy nitrite and superoxide ROS                                                                                                     | Antioxidant properties in PD                                                          | [31]                  |
| N-acetylcysteine                                 | Protects against cadmium induced ROS toxicity marked by reduced mitochondrial membrane potential, high cytoplasmic cytochrome c release, reduced Bcl-2 expression, p53 expression and caspase pathways | Neuroprotective properties in SZ                                                      | [23], [25]            |
| Naringin, hesperidin and kaempferol (flavonoids) | Exert protective action against peroxy nitrite induced oxidative damage and inhibit nitric oxide synthase (involved in HD)                                                                             | Anti-inflammatory, antioxidant and neuroprotection in HD                              | [23]                  |
| Olanzapine                                       | An antipsychotic agent with affinity for D1 and D2 dopamine receptors as well as 5-HT <sub>2A</sub> serotonin receptors                                                                                | Improved motor symptoms in HD                                                         | [23]                  |
| Olesoxime                                        | Scavenges the toxic by-products of lipid peroxidation                                                                                                                                                  | Antioxidant and neuroprotective activities in neuropathy                              | [32]                  |
| Perampanel (Celastrus regelii)                   | Inhibit nitric oxide synthase (involved in PD and HD)                                                                                                                                                  | Anti-inflammatory, antioxidant and neuroprotective activities in PD and HD            | [23], [24]            |
| Riluzole                                         | Reduces ROS generation via induction of glutathione production                                                                                                                                         | Antioxidant properties in ALS                                                         | [33]                  |
| Sesamol (Sesamum indicum)                        | Suppress inducible nitric oxide synthase (iNOS) expression and neuroinflammation in hippocampus neurons                                                                                                | Antioxidant, and neuroprotective activities in HD                                     | [23]                  |

|                                                                                                                           |                                                                                                             |                                                                                      |                  |
|---------------------------------------------------------------------------------------------------------------------------|-------------------------------------------------------------------------------------------------------------|--------------------------------------------------------------------------------------|------------------|
| Steroidal lactones (withaferin A, withanolide A, withanolide D-P) ( <i>Withania somnifera</i> )                           | Improves cognitive functions and restores acetylcholinesterase enzyme activity                              | Antioxidant and neuroprotective properties in HD                                     | [23]             |
| Terpene lactones (ginkgolides and bilobalides) and flavonoids (flavonols and flavone glycosides) ( <i>Ginkgo biloba</i> ) | Stabilize mitochondrial functions like ATP levels and interacts with mitochondrial electron transport chain | Antioxidant and neuroprotective properties in dementia, AD and PD                    | [23], [24], [26] |
| Triterpene saponin (glycyrrhizin) and phenol (isoliquiritigenin) ( <i>Glycyrrhiza</i> )                                   | Reduces oxidative stress and damage to brain cells                                                          | Antioxidant, anti-inflammatory and neuroprotective properties in dementia, AD and PD | [23], [24], [26] |
| Triterpenoid saponins (Bacosides A and B) ( <i>Herpestis monniera</i> )                                                   | Scavenging of free radicals and improves memory                                                             | Antioxidant, anti-stress, antidepressant and useful in HD treatment                  | [23], [24]       |
| Triterpenoid saponins (asiaticoside, asiatic acid and madecassoside) ( <i>Centella asiatica</i> )                         | Reduction in the activity of electron transport chain enzymes and decreased mitochondrial viability         | Antioxidant and neuroprotective properties in HD                                     | [23]             |
| Vitamin C                                                                                                                 | Maintains the integrity of cellular membranes in mitochondria                                               | Antioxidant and neuroprotective activities in neuropathy                             | [23]             |
| Vitamin E                                                                                                                 | Maintains the integrity of cellular membranes in mitochondria                                               | Antioxidant properties in AD                                                         | [22], [23]       |
| Z-LEHD-FMK                                                                                                                | Caspase-9 inhibitor                                                                                         | Neuroprotective properties in epilepsy                                               | [23]             |
| Z-FA-MK                                                                                                                   | Anti-apoptotic in function which suppress some form of apoptosis                                            | Effective therapeutic target in MS                                                   | [23], [34]       |

**Supplementary Table S5.** Neuroprotective substances targeting cell death at distinct molecular levels in different neuropathological models.

| Substance                       | Target/Interaction                                | Disorder | <i>In vitro</i>        | <i>In vivo</i><br>(animal/tissue) | Conclusions                                                                                                                                                                                                                                                                                    | Reference |
|---------------------------------|---------------------------------------------------|----------|------------------------|-----------------------------------|------------------------------------------------------------------------------------------------------------------------------------------------------------------------------------------------------------------------------------------------------------------------------------------------|-----------|
| Ac-YVAD-CMK/Ac-DEVD-CMK         | Caspases and CPP32-like caspases                  | PD       | -                      | rats (brain)                      | Failure of these caspase inhibitors to augment TH-ir neuron survival                                                                                                                                                                                                                           | [35]      |
|                                 |                                                   | ND       | Neuronal cell cultures | rats (blood, brain)               | Rescued neuronal cells from cell death in response to oxidative stress and oxygen/glucose deprivation                                                                                                                                                                                          | [36]      |
| <i>Bacopa monnieri</i> extract* | Oxidative stress                                  | PNS      | Amygdala               | rat (brain)                       | Ameliorates Learning and Memory Impairments through Synaptic Protein, Neurogranin, Pro- and Mature BDNF Signaling, and HPA Axis                                                                                                                                                                | [37]      |
| Cryptotanshinone (quinoid)      | Oxidative stress and inflammation                 | PD       | hiNPS                  | -                                 | Anti-apoptotic properties in PD-hiNPCs, significantly reduced cellular apoptosis through mitochondrial restoration (reactive oxygen species and mitochondrial membrane potential). These effects are mediated via the nuclear factor erythroid 2-related factor 2 (NRF2) pathway in PD-hiNPCs. | [38]      |
| Cystamine (CYS)                 | Oxidative stress/apoptosis                        | SZ       | -                      | mice (brain)                      | Increased BDNF protein levels in mouse frontal cortex, prevention of chronic HAL treatment-induced reduction in BDNF, GSH, and Bcl-xl protein levels, prevention of reduction in neuronal cell viability, BDNF protein levels and apoptosis.                                                   | [39]      |
| DHA (fatty acid)                | Oxidative stress, modulation of membrane fluidity | AD       | HEK293 cells           | -                                 | Increased membrane fluidity and non-amyloidogenic processing of APP, leading to enhanced secretion of sAPP $\alpha$ . This enhanced secretion of sAPP $\alpha$ was associated with substantial protection against apoptosis induced by ER Ca <sup>2+</sup> store depletion                     | [40]      |
| Flavones                        | Oxidative stress                                  | ND       | SH-SY5Y                | -                                 | Neuroprotection was found to be mediated via activation of the anti-apoptotic cell survival proteins of the ERK1/2 and PI3K/Akt pathways. S                                                                                                                                                    | [41]      |

|                                                                                                                          |                                          |     |                                    |                    |                                                                                                                                                                                                                                                                  |      |
|--------------------------------------------------------------------------------------------------------------------------|------------------------------------------|-----|------------------------------------|--------------------|------------------------------------------------------------------------------------------------------------------------------------------------------------------------------------------------------------------------------------------------------------------|------|
| Erythropoietin (hormone)                                                                                                 | BDNF and other neurotrophins             | ND  | <i>in vitro</i> and <i>in vivo</i> | rats (brain)       | Prevention of HAL-induced reduction in BDNF, increase in caspase-3 and decrease in Bcl-xl protein levels.                                                                                                                                                        | [42] |
| 17β-Estradiol (steroid)                                                                                                  | Not fully established                    | RD  | Primary rat RNCs                   | rats (brain)       | Suppression the Bax-involved mitochondrial apoptosis to protect the RNCs from H <sub>2</sub> O <sub>2</sub> insult by activating the PI3K/Akt pathway                                                                                                            | [43] |
| JM-20 (anxiolytic)                                                                                                       | Mitochondria                             | ND  | -                                  | rats (brain)       | Strong antioxidant action and protective effects against Ca <sup>2+</sup> -induced impairment, which are both elicited at the mitochondrial level                                                                                                                | [44] |
| Leupeptin, calpain inhibitor XI AND Z-VAD.FMK                                                                            | Calpains and caspases                    | ALS | -                                  | mice (spinal cord) | Leupeptin and calpain inhibitor XI inhibited apoptosis in the motor neurons while Z-VAD.FMK had no effect. Leupeptin, but not calpain inhibitor XI and Z-VAD.FMK inhibited nucleosomal DNA fragmentation                                                         | [45] |
| Lixisenatide/liraglutide (GLP-1)                                                                                         | GLP-1 receptor                           | PD  | -                                  | mice (brain)       | Exendin-4 showed no protective effects at the dose chosen. Both liraglutide and lixisenatide prevented the MPTP-induced motor impairment, reduced dopamine synthesis; and promoted decrease in Bax and an increase in bcl-2                                      | [46] |
| LMWSC (sulfated chitosan is the structural analog of heparin converted to low molecular weight polymer by γ-irradiation) | Lipids                                   | PD  | SH-SY5Y                            | -                  | Reduction of the intracellular ROS levels, normalization of antioxidant enzymes, mitigation of rotenone induced mitochondrial dysfunction and apoptosis                                                                                                          | [47] |
| Melatonin                                                                                                                | Mitochondria                             | ND  | -                                  | mice (brain)       | Protective role against H <sub>2</sub> O <sub>2</sub> -induced memory impairment                                                                                                                                                                                 | [48] |
| Memantine                                                                                                                | N-methyl-D-aspartate receptor antagonist | AD  | SH-SY5Y                            | -                  | Upregulation of neuronal cell survival, inhibition of neuronal autophagy and apoptosis. Upregulation of the expression of signaling molecules phosphorylated (p)-phosphoinositide 3-kinase, p-Akt and p-mammalian target of rapamycin (mTOR), and inhibition the | [28] |

|                                                  |                                  |     |                          |              |                                                                                                                                                                                                                                                                                                                                                                                    |      |
|--------------------------------------------------|----------------------------------|-----|--------------------------|--------------|------------------------------------------------------------------------------------------------------------------------------------------------------------------------------------------------------------------------------------------------------------------------------------------------------------------------------------------------------------------------------------|------|
|                                                  |                                  |     |                          |              | phosphorylation of bcl2/Beclin-1 complex via mitogen-activated protein kinase 8.                                                                                                                                                                                                                                                                                                   |      |
| Minocycline                                      | Microglia                        | PD  | Primary neuronal culture | mice (brain) | Inhibition of microglial activation by minocycline protects against the rotenone toxic effects and prevented the dropout of tyrosine hydroxylase and apoptosis by rotenone                                                                                                                                                                                                         | [49] |
| N-acetyl-L-tryptophan (L-NAT)                    |                                  | ALS | NSC-34 motor neurons     | mice (brain) | Neuroprotective in primary motor neurons by inhibition of the secretion of Substance P and IL-1 $\beta$ and mitochondrial dysfunction by inhibiting the release of cytochrome c/Smac/AIF and activation of apoptotic pathways (caspase-1, -9, and -3), as well as proteasomal dysfunction through restoring chymotrypsin-like, trypsin-like, and caspase-like proteasome activity. | [50] |
| Nicotinamide                                     | Mitochondria                     | ND  | -                        | rats (brain) | Inhibition of ketamine-induced neuro-apoptosis by downregulating Bax, inhibiting cytochrome c release from mitochondria into cytosol, and inhibiting the expression of activated caspase-3                                                                                                                                                                                         | [51] |
| Olomoucine/BAF                                   | Cyclin-dependent kinase/caspases | AD  | SH-SY5Y                  | -            | Cyclin-dependent kinase inhibitor reduced camptothecin-induced cell death and decreased the effects on tau phosphorylation. The general caspase inhibitor decreased camptothecin-induced cell death, but did not significantly affect tau phosphorylation.                                                                                                                         | [52] |
| Oxyntomodulin analog (hormone and growth factor) | GLP-1 and the glucagon receptor. | PD  | -                        | mice (brain) | Prevention of the MPTP-induced motor impairment, reduction in TH levels (dopamine synthesis), the reduction of the synaptic marker synaptophysin, the inactivation of the growth factor kinase Akt/PKB and of Bcl-2, and the increase pro-inflammatory cytokine TNF- $\alpha$ levels                                                                                               | [53] |

|                                                 |                                                                                                                                                           |     |                                      |                       |                                                                                                                                                                                                                                                                                                                                                                         |            |
|-------------------------------------------------|-----------------------------------------------------------------------------------------------------------------------------------------------------------|-----|--------------------------------------|-----------------------|-------------------------------------------------------------------------------------------------------------------------------------------------------------------------------------------------------------------------------------------------------------------------------------------------------------------------------------------------------------------------|------------|
| P7C3 (aminopropyl carbazole)                    | Mitochondria                                                                                                                                              | PD  | Dopaminergic cell line               | mice (brain)          | P7C3 stabilized mitochondrial membrane potential, reduced reactive oxygen species production, and inhibited GSK3 $\beta$ activation, p53 activity, Bax upregulation and cytochrome c release exposed to MPP+, and prevented neuronal loss in the substantia nigra                                                                                                       | [54, p. 3] |
| Peroxiredoxin                                   | Oxidative stress and apoptosis (via signal-regulating kinase (ASK1)-dependent activation of the c-Jun N-terminal kinase/c-Jun and p38 pro-death pathways) | PD  | MN9D neuronal cells and human brains | mice/human (brain)    | <i>In vitro</i> and <i>in vivo</i> neuroprotection against 6-OHDA toxicity in DA neurons, and preserved motor functions involving the dopamine system in mouse. PRX2 exhibited antioxidant and anti-apoptotic effects via suppression of apoptosis signal-regulating kinase (ASK1)-dependent activation of the c-Jun N-terminal kinase/c-Jun and p38 pro-death pathways | [55]       |
| Pridopidine                                     | Dopamine stabilizer                                                                                                                                       | PNS | -                                    | mice (brain)          | Increased expression of pro-survival and neurostimulatory molecules BDNF and DARPP32, reduction in the size of mHtt aggregates in striatal tissues                                                                                                                                                                                                                      | [56]       |
| Quercetin (flavonoid)                           | Antioxidant/anti-inflammatory                                                                                                                             | ND  | -                                    | rats (brain)          | Quercetin supplementation decreased the neuronal damage and scavenged the free radicals induced by PCBs and protects PCBs induced apoptosis and oxidative stress.                                                                                                                                                                                                       | [57]       |
| Retinoic acid                                   | Proteasome                                                                                                                                                | PD  | SH-SY5Y cells                        | human (neuroblastoma) | A treatment of cultured neuroblastoma cells sets up conditions under which proteasome inhibition, and the resultant accumulation of ubiquitinated proteins, loses its ability to kill the cells                                                                                                                                                                         | [58]       |
| Sildenafil (phosphodiesterase type 5 inhibitor) | Cyclic GMP phosphodiesterase                                                                                                                              | MS  | -                                    | mice (spinal cord)    | Inhibited nitrosative stress and augmented the levels of LC3, beclin-1, ATG5, p-CREB and BDNF and decreased mTOR levels, as well as augmented p-AMPK.                                                                                                                                                                                                                   | [59]       |
| Triple GLP-1/GIP/glucagon                       | GIP-1, GIP and glucagon receptors                                                                                                                         | AD  | -                                    | mice (brain)          | Reversion the memory deficit in the APP/PS1 mice                                                                                                                                                                                                                                                                                                                        | [60]       |

|                                                                                                  |                                             |    |                           |                 |  |                                                                                                                                                                                                                                            |      |
|--------------------------------------------------------------------------------------------------|---------------------------------------------|----|---------------------------|-----------------|--|--------------------------------------------------------------------------------------------------------------------------------------------------------------------------------------------------------------------------------------------|------|
| receptor agonist<br>(triple agonist)                                                             |                                             |    |                           |                 |  | in a spatial water maze test and reduction of the levels of Bax, increased Bcl-2, BDNF and synaptophysin, neurogenesis enhancement in the dentate gyrus, decrease of $\beta$ -amyloid, neuroinflammation and oxidative stress              |      |
| Voltage channels<br>(agonist for the AMPA receptor where it mimics the effects of the glutamate) | AMPA receptor<br>Reduced caspase-3 activity | SZ | -                         | rats (brain)    |  | Pretreatment with the calcium channel blocker cadmium chloride eliminated AMPA-mediated protection against PCP. VDCCs might be advantageous in treating conditions associated with diminished NMDAergic activity during early development. | [61] |
| VDAC1-derived peptide                                                                            | VDAC (mitochondria)                         | AD | SH-SY5Y and PC12          | -               |  | A $\beta$ Entry into SH-SY5Y Cells Is Inhibited by the VDAC1 N-Ter Peptide                                                                                                                                                                 | [62] |
| Y27632/NAD <sup>+</sup> /ZVAD-FMK/resveratrol                                                    | Kinase/Caspase                              | ND | Primary neuronal culture  | mice (brain)    |  | Y27632 and NAD <sup>+</sup> exert strong synapto-protective activities whereas zVAD-FMK and resveratrol fail to protect synapses                                                                                                           | [63] |
| Zileuton                                                                                         | 5-Lipoxygenase (5-LOX)                      | ND | HT22 mouse neuronal cells | mice (brain)    |  | Neuroprotection from glutamate-induced oxidative stress at least in part by inhibiting ferroptosis                                                                                                                                         | [64] |
| ZVAD-FMK/IETD-FMK                                                                                | Caspase                                     | PD | SH-SY5Y                   | -               |  | Complete apoptotic prevention by the broad caspase inhibitor zVAD-FMK but not by the caspase-8 inhibitor IETD-FMK.                                                                                                                         | [65] |
| Z-VAD-FMK/Z-DEVD-FMK/Z-LEHD-FMK                                                                  | Caspase                                     | ND | -                         | sparrow (brain) |  | Reduction of programmed cell death by local infusion of caspase inhibitors rescues a telencephalic nucleus in the adult avian song control system from hormone withdrawal-induced neurodegeneration                                        | [66] |

6-OHDA, 6-hydroxydopamine; AD, Alzheimer's disease; ALS, amyotrophic lateral sclerosis; AMPA,  $\alpha$ -amino-3-hydroxy-5-methyl-4-isoxazolepropionic acid; APP,  $\beta$ -amyloid precursor protein; BAF, Boc-aspartyl (OMe)-fluoromethylketone; BDNF, brain derived neurotrophic factor; Ct, clinical trial; DHA, omega-3 fatty acid docosahexaenoic acid; GIP, glucose-dependent insulinotropic polypeptide; GLP-1, Glucagon-like peptide 1; HAL, haloperidol; HD, Huntington's disease; hiNPS, human induced neuroprogenitor stem cells; HPA, hypothalamic–pituitary–adrenal; GSK3 $\beta$ , glycogen synthase kinase-3 beta; L-NAT, N-acetyl-L-tryptophan; LMWSC, low molecular weight sulfated chitosan; MPP<sup>+</sup>, 1-methyl-4-phenylpyridinium; MS, multiple sclerosis; NAD<sup>+</sup> nicotinamide adenine dinucleotide; ND, neurodegeneration; PD, Parkinson's disease; PNS, prenatal stress; RD, retinal degeneration; RNCs, retinal cells; ROS, reactive oxygen species; TH, tyrosine hydroxylase; Y27632, Rho Kinase inhibitor \* This study based on prenatal stress induction in rats represents a close model with homology to SZ models; SZ, schizophrenia.

**Supplementary Table S6.** Quantitative data of molecular and clinical outcomes by using anti-apoptotic compounds in models of neurodegeneration and neuroprogression.

| Compound              | Target/interaction                           | Disease | Model                            | Source of sample                            | Parameter                          | Outcome                                                | Treated group       | Control group       | Sample size | p value | Reference |
|-----------------------|----------------------------------------------|---------|----------------------------------|---------------------------------------------|------------------------------------|--------------------------------------------------------|---------------------|---------------------|-------------|---------|-----------|
| Albumin               | Mitochondria                                 | ND      | ER stress induced SH-SY5Y        | SH-SY5Y neuroblastoma                       | Apoptosis                          | Apoptotic rate induced by flunarizine (% cells)        | 14%                 | 65%                 | n=15        | p<0.05  | [67]      |
|                       |                                              |         |                                  |                                             | Apoptosis                          | Apoptotic rate induced by cyclopiazonic acid (% cells) | 23%                 | 8%                  | n=15        | p<0.05  |           |
| Ac-LETD-CHO           | Caspase-3                                    | ND      | glucotoxicity-induced neuropathy | ND7/23 neuronal cells                       | Apoptosis                          | Caspase-3                                              | 35% <sup>v</sup>    | -                   | n=15        | p=0.02  | [68]      |
| Anthocyanins          | AMPK pathway                                 | ND      |                                  | Mouse hippocampal cells (HT22)              | % cells with low $\Delta\Psi_{mt}$ | $^v\Delta\Psi_{mt}$                                    | 35.56±8.5 %         | 65±4.1%             | n=12        | p<0.05  | [69]      |
| Asiatic acid          | Oxidative stress, mitochondria, inflammation | PD      | Rotenone induction               | SH-SY5Y                                     | Cell survival                      | MTT (%)                                                | 55.37% <sup>^</sup> |                     | n=28        | p<0.05  | [70]      |
| Asiaticoside          | Unclear anti-apoptotic mechanism             | AD      | A $\beta$ 1-42 induced           | human brain microvascular endothelial cells | Apoptosis                          | Annexin V+/PI+ (apoptosis %)                           | 35.20 ± 5.26%       | 66.40 ± 4.82%       | n=18        | p<0.01  | [71]      |
| BAF                   | Caspases                                     | MSA     | NGF-withdrawal                   | superior cervical ganglia neurons           | Neuronal resistance                | Neuronal action potential (M $\Omega$ )                | 577±45              | 198±21              | n=36        | p<0.05  | [72]      |
| Baicalein             | Proteasome                                   | PD      |                                  | NGF-differentiated PC12 cells               | Cell death                         | MTT                                                    | 51% <sup>v</sup>    | -                   | n=24        |         | [73]      |
| bpV(pic)              | Phosphatase and tensin homolog (PTEN)        | AD      | A $\beta$ 25-35                  | SH-SY5Y                                     | Apoptotic rate                     | Annexin V+                                             | 12.8±2.2 %          | 25.2±4.6%           | n=18        | p<0.05  | [74]      |
| B355252               | Nerve growth factor                          | PD      | 6-OHDA induced                   | HT22                                        | Cell viability                     | Resazurin (7-Hydroxy-3H-phenoxazine-3-one 10-oxide)    | 31.7 % <sup>^</sup> | 76.6 % <sup>v</sup> | n=15        | p<0.001 | [75]      |
|                       |                                              |         |                                  |                                             |                                    | JNK1/2 phosphorylation (relative units)                | 16.8 % <sup>v</sup> | 65% <sup>^</sup>    | n=15        | p<0.001 |           |
| C. tomentosum extract |                                              |         |                                  |                                             | Cell viability                     | MTT (% of control)                                     | 81.29 ± 3.68%       | 56.41±5.05          | n=21        | p<0.05  | [76]      |
|                       |                                              |         |                                  |                                             | Mitochondrial membrane potential   | Monomers/aggregates JC1 (%)                            | 128.00±5.61%        | 191.17±6.52%        | n=21        | p<0.05  |           |

|               |                                                    |     |                                         |                               |                                        |                                                          |                           |               |        |              |
|---------------|----------------------------------------------------|-----|-----------------------------------------|-------------------------------|----------------------------------------|----------------------------------------------------------|---------------------------|---------------|--------|--------------|
| CGP 3466B     | Glyceraldehyde-3-phosphate dehydrogenase           | ALS |                                         |                               | Disease progression                    | Disease progression (days)                               | 30% <sup>v</sup>          | -             | p<0.05 | [77]         |
|               |                                                    |     |                                         |                               | Lifespan                               | Lifespan (days)                                          | 53.7±2.5 %                | 42.3±0.8      | n=30   | p<0.05       |
|               |                                                    |     |                                         |                               |                                        | Motor neurons (counts)                                   | 733±41                    | 548±46        | n=13   | p<0.05       |
| CHA79*        | Oxidative stress, neurotrophic factors, glyoxalase | ND  | MG-mediated neurotoxicity               | SH-SY5Y cells                 | Cell viability                         | MTT (%)                                                  | 78.59±3.68 %              | 60.61±2.70 %  | n=30   | p<0.05 [78]  |
|               |                                                    |     |                                         |                               | Apoptosis                              | Annexin V+ (%)                                           | 12.49±0.82 %              | 21.46±1.78 %  | n=30   | p<0.05       |
|               |                                                    |     |                                         |                               | Oxidative stress                       | ROS production<br>H2DCF-DA staining (DCF fluorescence %) | 121.54 ± 7.75 %           | 142.80 ± 5.08 | n=30   | p<0.05       |
|               |                                                    |     |                                         |                               | Oxidative stress (antioxidant enzymes) | SOD activity (U/mg protein)                              | 39.38 ± 2.49              | 25.34 ± 1.69  | n=30   | p<0.05       |
|               |                                                    |     |                                         |                               | Oxidative stress (antioxidant enzymes) | GSH levels (OD 405 nm, nmol/mg protein)                  | 52.90 ± 1.25              | 38.84 ± 1.89  | n=30   | p<0.05       |
| Cycloheximide | Protein synthesis                                  | ND  | MK801 induced                           | rat retrosplenial cortex      | Neuronal death                         | Nº of dying neurons                                      | 33±18                     | 510 ± 20      | n=28   | p<0.001 [79] |
| Dapagliflozin | Sodium-glucose co-transporter-2                    | HD  | 3-NP exposure                           |                               | Behavioral data (beam)                 | Time to cross the beam                                   | 32% <sup>v</sup>          | -             | n=40   | p<0.01 [80]  |
|               |                                                    |     |                                         |                               | Behavioral data (retraction time)      | Time (retraction time)                                   | 61% <sup>v</sup>          | -             | n=40   | p<0.01       |
|               |                                                    |     |                                         |                               | Behavioral data (transfer latency)     | Time (transfer latency)                                  | 56% <sup>v</sup>          | -             | n=40   | p<0.01       |
| FK506         | Calcineurin                                        | HD  | 3-NP exposure                           | Primary mice striatal neurons | Cell death necrosis vs. Controls       | Cell death (% total cells)                               | 10.77±2.39 % <sup>v</sup> | -             | n=15   | p<0.05 [81]  |
| Forsythiaside | Oxidative stress, bacteria, inflammation           | AD  | H2O2-induced toxicity                   | PC12 cells                    | Apoptosis                              | % Annexin V+ cells                                       | 8.49 %                    | 24.52 %       | n=12   | p<0.01 [82]  |
| Fucoidan      | Mitochondria                                       | AD  | Aβ25–35 and D-Gal-induced neurotoxicity |                               | Behavioral data (water maze)           | Escape latency time (s)                                  | 28.52±16.51               | 38.62±19.51   | n=24   | p<0.05 [83]  |

|                             |                  |    |               |                                |                                                     |                                              |                     |                   |      |         |      |
|-----------------------------|------------------|----|---------------|--------------------------------|-----------------------------------------------------|----------------------------------------------|---------------------|-------------------|------|---------|------|
|                             |                  |    |               |                                | Oxidative stress                                    | Cell ROS deep red 640/655 nm                 | 41.5 % <sup>v</sup> | 50 % <sup>^</sup> | n=15 | p<0.001 |      |
| Gallic acid (Corni fructus) | Oxidative stress |    |               |                                | Oxidative stress                                    | ROS production CM-H2DCFDA (DCF fluorescence) | 73.00 ± 13.05%      | 100 ± 3.83%       | n=12 | p<0.001 |      |
| Hepad 1 and 2               | Caspase-3/9      | PD | MPTP          | C57BL/6 mice and SH-SY5Y cells | Cell viability                                      | MTT (%)                                      | 86.5% <sup>^</sup>  | -                 | n=18 | p<0.05  | [84] |
|                             |                  |    |               |                                | Oxidative stress                                    | NOX-4 protein levels (intensity)             | 1.43x <sup>v</sup>  | -                 | n=18 | p<0.05  |      |
|                             |                  |    |               |                                | Cell cycle (extracellular signal regulated kinases) | p-ERK protein levels (intensity)             | 1.1x <sup>v</sup>   | -                 | n=18 | p<0.05  |      |
|                             |                  |    |               |                                | Dopaminergic viability                              | TH+ neurons                                  | 2x <sup>^</sup>     | -                 | n=18 | p<0.05  |      |
|                             |                  |    |               |                                | Inflammatory response                               | TNFα protein levels                          | 2.7x <sup>v</sup>   | -                 | n=18 | p<0.05  |      |
|                             |                  |    |               |                                | Inflammatory response                               | IL6 protein levels                           | 1.5x <sup>v</sup>   | -                 | n=18 | p<0.05  |      |
|                             |                  |    |               |                                | Inflammatory response                               | iNOS protein levels                          | 2.9x <sup>v</sup>   | -                 | n=18 | p<0.05  |      |
|                             |                  |    |               |                                | Inflammatory response                               | Mac-1 protein levels                         | 1.2x <sup>v</sup>   | -                 | n=18 | p<0.05  |      |
|                             |                  |    |               |                                | Apoptosis                                           | p53 protein levels (intensity)               | 1.4x <sup>v</sup>   | -                 | n=18 | p<0.05  |      |
|                             |                  |    |               |                                | Apoptosis                                           | Bax protein levels (intensity)               | 1x <sup>v</sup>     | -                 | n=18 | p<0.05  |      |
|                             |                  |    |               |                                | Anti-apoptotic protein family                       | Bcl-2 protein levels (intensity)             | 1.2x <sup>^</sup>   | -                 | n=18 | p<0.05  |      |
|                             |                  |    |               |                                | Apoptosis (activation signaling)                    | PARP1 protein levels (intensity)             | 1.1x <sup>v</sup>   | -                 | n=18 | p<0.05  |      |
|                             |                  |    |               |                                | Oxidative stress (antioxidant enzymes)              | SOD protein levels (intensity)               | 2.2x <sup>^</sup>   | -                 | n=18 | p<0.05  |      |
|                             |                  |    |               |                                | Oxidative stress (antioxidant enzymes)              | GST protein levels (intensity)               | 2.9x <sup>^</sup>   | -                 | n=18 | p<0.05  |      |
|                             |                  |    |               |                                | Cell survival signaling regulation                  | p-AKT                                        | 1x <sup>v</sup>     | -                 | n=18 | p<0.05  |      |
| iMACs                       | Mitochondria     | ND | Staurosporine | Mitochondria from FL5.12 cells | Onset MOMP                                          | Onset MOMP* (h)                              | 12.52±0.9 h         | 6.83±1.1h         | n=21 | p<0.001 | [85] |

|                |                                                |    |                     |                 |                                                        |                                |            |             |      |         |      |
|----------------|------------------------------------------------|----|---------------------|-----------------|--------------------------------------------------------|--------------------------------|------------|-------------|------|---------|------|
|                |                                                |    |                     |                 | Apoptosis                                              | Bax fluorescence (%)           | 22%        | 81%         | n=22 | p<0.001 |      |
| JJDHYZ         | Mitochondria and ER                            | PD | MPTP-induced        | Corpus striatum | Monoamine neurotransmitters                            | Dopamine (pg/ul)               | 174.1±34.9 | 54.8 ± 15.4 | n=25 | p<0.01  | [86] |
| JM-20          | Oxidative stress, excitotoxicity, inflammation | AD | Scopolamine         |                 | Antioxidant activities                                 | SOD (U/min mg protein)         | 4.31±0.044 | 2.89±0.003  | n=50 | p<0.05  | [87] |
|                |                                                |    |                     |                 | Antioxidant activities                                 | CAT (U/min mg protein)         | 8.21±1.874 | 4.77±0.349  | n=50 | p<0.05  |      |
|                |                                                |    |                     |                 | Total tissue SH                                        | TSH (umol/mg protein)          | 1.99±0.167 | 1.23±0.134  | n=50 | p<0.05  |      |
|                |                                                |    |                     |                 | Lipid peroxidation                                     | MDA (nmol/mg protein)          | 2.01±0.230 | 3.84±0.490  |      |         |      |
| Licochalcone A | JNK1                                           | ND | Kainic acid induced | Hippocampus     | Apoptotic cascade biomarkers                           | BCL-2 (AU)                     | 14%^       | -           | n=60 | p<0.01  | [88] |
|                |                                                |    |                     |                 | Apoptotic cascade biomarkers                           | Bax                            | 31%^       | -           | n=60 | p<0.01  |      |
|                |                                                |    |                     |                 | Apoptotic cascade biomarkers                           | Bim                            | 48.9%^     | -           | n=60 | p<0.01  |      |
|                |                                                |    |                     |                 | Apoptotic cascade biomarkers                           | CaSBC                          | 38.7%^     | -           | n=60 | p<0.01  |      |
|                |                                                |    |                     |                 | Apoptotic cascade biomarkers                           | CaSBC3                         | 49.1%^     | -           | n=60 | p<0.01  |      |
|                |                                                |    |                     |                 | Disease outcomes                                       | Seizures                       | 1.83±0.17  | 2.46±0.16   | n=30 | p<0.05  |      |
|                |                                                |    |                     |                 | Survival pathways                                      | Phosphorylated AKT             | 45.6%^     | -           | n=60 | p<0.01  |      |
|                |                                                |    |                     |                 | Mitochondrial stress responses                         | PGC1a                          | 9.5%^      | -           | n=60 | p<0.01  |      |
|                |                                                |    |                     |                 | Neuroinflammatory responses                            | TNFa                           | 33.5%^     | -           | n=60 | p<0.01  |      |
|                |                                                |    |                     |                 | Neuroinflammatory responses                            | Induced nitric oxide synthase  | 38.49%^    | -           | n=60 | p<0.01  |      |
|                |                                                |    |                     |                 | Neuroinflammatory responses                            | Neuronal nitric oxide synthase | 25.8%^     | -           | n=60 | p<0.01  |      |
|                |                                                |    |                     |                 | Metalloproteases associated activation of soluble TNFa | ProADAM10                      | 40.31%^    | -           | n=60 | p<0.01  |      |
|                |                                                |    |                     |                 | Metalloproteases                                       | ADAM10                         | 24.8%^     | -           | n=60 | p<0.01  |      |

|                                               |                                   |    |                          |                                                |                                      |                                           |                       |                    |      |               |
|-----------------------------------------------|-----------------------------------|----|--------------------------|------------------------------------------------|--------------------------------------|-------------------------------------------|-----------------------|--------------------|------|---------------|
| associated activation of soluble TNF $\alpha$ |                                   |    |                          |                                                |                                      |                                           |                       |                    |      |               |
| MADP (salidroside analog)                     | Oxidative stress, inflammation    | ND | Glutamate induced        | Culture hippocampal neurons                    | Cell viability                       | MTT                                       | 75.5% <sup>^</sup>    | 60.9% <sup>v</sup> | n=18 | p<0.05 [89]   |
|                                               |                                   |    |                          |                                                | Apoptotic rate                       | Apoptotic cell counts (%)                 | 59.2%                 | 73.6%              | n=18 | p<0.01        |
|                                               |                                   |    |                          |                                                | Apoptotic rate                       | Annexin V+                                | 30.2%                 | 55.1%              | n=18 | p<0.01        |
|                                               |                                   |    |                          |                                                | Necrosis                             | Annexin V+/PI+                            | 1.7%                  | 8.2%               | n=18 | p<0.01        |
| Methylene blue                                | Caspase-6                         | AD | Caspase-6 overexpressing | Hippocampus (mice)                             | Synaptic function (theta-burst LTP*) | fEPSP slope                               | 141.22%               | 132.42%            | n=42 | p=0.0003 [90] |
| Metformin                                     | Mitochondria                      | ND | Etoposide-induced        | Primary cortical neurons (rat)                 | Calcium retention capacity (PTP)     | Nmol Ca <sup>2+</sup> /10e7 cells         | 50% <sup>^</sup>      | -                  | n=12 | p<0.05 [91]   |
| Methylene blue                                | Mitochondria                      | ON | Rotenone induction       | Retinal ganglion cells (Inner plexiform layer) | Cytochrome oxidase activity          | Cytochrome oxidase activity               | 22% <sup>^</sup>      | -                  | n=18 | p=0.036 [92]  |
|                                               |                                   |    |                          |                                                | Oxidative stress                     | TEP U/ml                                  | 1.1 $\pm$ 0.05        | 4.6 $\pm$ 0.1      | n=9  | p=0.004       |
|                                               |                                   |    |                          |                                                | Cell viability                       | Calcein-Acetomethoxy/Ethidium Homodimer-1 | 1.6-fold <sup>^</sup> |                    | n=6  | p<0.001       |
|                                               |                                   |    |                          |                                                | Behavioral data (water maze)         | Water maze (correct choices)              | 83.5 $\pm$ 8%         | 49.3 $\pm$ 2%      | n=28 | p=0.298 [93]  |
| M17Z protein                                  | Caspase-1                         | HD | Transgenic R6/2 mice     |                                                | Disease onset                        | Days of disease onset                     | 84.4 $\pm$ 2.0        | 77.1 $\pm$ 1.4     | n=21 | 0.012 [17]    |
| M40403*                                       | Oxidative stress                  | SZ | Phencyclidine induced    | Striatum                                       | Apoptosis                            | TUNEL+ cells                              | 6.3 $\pm$ 1.3         | 9.0 $\pm$ 1.9      | n=24 | p<0.05 [94]   |
|                                               |                                   |    |                          |                                                | Disease length                       | Days of disease length                    | 36.8 $\pm$ 3.3        | 23.8 $\pm$ 2.4     | n=21 | 0.0075        |
|                                               |                                   |    |                          |                                                | Mortality                            | Mortality (days)                          | 121.3 $\pm$ 3.7       | 100.9 $\pm$ 2.5    | n=21 | 0.0007        |
| Minocycline                                   | Caspases, mitochondria, microglia | HD | Human patients           | Human patients                                 | Motor function                       | Chorea                                    | 7.0 $\pm$ 7.1         | 8.9 $\pm$ 6.3      | n=11 | p=0.067 [95]  |
|                                               |                                   |    |                          |                                                | Neuropsychological function          | Symbol digit modalities test              | 26.0 $\pm$ 8.9        | 35.3 $\pm$ 9.3     | n=11 | p=0.008       |
|                                               |                                   |    |                          |                                                | Psychiatric symptoms                 | Total psychiatric score                   | 3.8 $\pm$ 5.5         | 13.2 $\pm$ 8.5     | n=11 | p=0.015       |
|                                               |                                   |    |                          |                                                | Psychiatric symptoms                 | Depressive symptoms                       | 2.4 $\pm$ 3.4         | 9.1 $\pm$ 6.0      | n=11 | p=0.016       |
|                                               |                                   |    |                          |                                                | Psychiatric symptoms                 | Apathy                                    | 0.9 $\pm$ 1.8         | 2.7 $\pm$ 1.8      | n=11 | p=0.005       |

|                    |                  |    |                           |            |                                 |                                         |                         |            |      |        |       |
|--------------------|------------------|----|---------------------------|------------|---------------------------------|-----------------------------------------|-------------------------|------------|------|--------|-------|
| D/SZ               |                  |    |                           |            | Depression                      | HAM-D-21                                | 6.7±1.9                 | 40.4 ± 2.5 | n=25 | p<0.05 | [96]  |
|                    |                  |    |                           |            | Psychotic symptoms              | BPRS scores                             | 4.6±2.4                 | 63.3 ± 8.7 | n=25 | p<0.05 |       |
| AD                 |                  |    |                           |            | Mitochondrial respiration       | State 2                                 | 38.3±3.3                | 21.88±3.8  | n=12 | p<0.05 | [97]  |
|                    |                  |    |                           |            | Mitochondrial respiration       | State 3                                 | 91.5±13.5               | 150.7±24.1 | n=12 | p<0.05 |       |
|                    |                  |    |                           |            | Mitochondrial respiration       | State 4                                 | 47.8±5.8                | 22.0±2.8   | n=12 | p<0.05 |       |
|                    |                  |    |                           |            | Mitochondrial respiration       | Respiratory control ratio               | 1.95±0.48               | 6.83±0.24  | n=12 | p<0.05 |       |
| Morinda citrifolia | Oxidative stress | PD | Rotenone induced          | Striatum   | Mitochondrial respiratory chain | Complex I                               | 22%^                    | -          | n=50 | p<0.05 | [98]  |
|                    |                  |    |                           |            |                                 | Complex IV                              | 23%^                    | -          | n=50 | p<0.05 |       |
|                    |                  |    |                           |            | Intrinsic apoptosis             | Cytochrome c release                    | 12%                     | 28%        | n=50 | p<0.05 |       |
| Naringin           | Oxidative stress | HD | 3-NP                      | striatum   | Antioxidant system              | SOD                                     | 10.84±1.02              | 6.8±0.57   | n=24 | p<0.05 | [99]  |
|                    |                  |    |                           |            | Antioxidant system              | Catalase                                | 1.92±0.15               | 1.42±0.14  | n=24 | p<0.05 |       |
|                    |                  |    |                           |            | Antioxidant system              | GPx                                     | 14.38±1.21              | 9.88±0.78  | n=24 | p<0.05 |       |
|                    |                  |    |                           |            | Antioxidant system              | GR                                      | 2.22±0.17               | 1.42±0.12  | n=24 | p<0.05 |       |
|                    |                  |    |                           |            | Lipid peroxidation              | Nmoles MDA/mg protein                   | 1.6±0.15                | 1.03±0.09  | n=24 | p<0.05 |       |
|                    |                  |    |                           |            | Protein carbonyl levels         | Protein carbonyl-nmol/mg protein        | 4.32±0.29               | 6.45±0.45  | n=24 | p<0.05 |       |
|                    |                  |    |                           |            | Membrane bound ATPases          | Na+/K+-ATPase                           | 0.33±0.03               | 0.69±0.06  | n=24 | p<0.05 |       |
|                    |                  |    |                           |            | Membrane bound ATPases          | Ca2+-ATPase                             | 0.23±0.02               | 0.32±0.03  | n=24 | p<0.05 |       |
|                    |                  |    |                           |            | Membrane bound ATPases          | Mg2+/ATPase                             | 0.30±0.03               | 0.46±0.04  | n=24 | p<0.05 |       |
| Osthole            | Mitochondria     | PD | MPP+-induced cytotoxicity | PC12 cells | Cell viability                  | MTT                                     | 32%^                    | -          | n=15 | p<0.01 | [100] |
|                    |                  |    |                           |            | Cell toxicity                   | LDH release                             | 160.8 ± 4.6%            | 210.9±5.8% | n=15 | p<0.01 |       |
|                    |                  |    |                           |            | Morphology of cell nuclei       | Nuclear condensation                    | 40.2±5.9%               | 48.9±6.4%  | n=15 | p<0.05 |       |
|                    |                  |    |                           |            | Apoptotic rate                  | Annexin V/PI                            | 35.8%                   | 59.4%      | n=15 | p<0.05 |       |
|                    |                  |    |                           |            | Intracellular ROS               | DCFH-DA fluorescent probe 485/535nm (%) | 152.5±7.9% <sup>v</sup> | -          | n=15 | p<0.01 |       |

|                                 |                                                              |        |                                |                           |                                           |                                              |                    |                   |        |               |
|---------------------------------|--------------------------------------------------------------|--------|--------------------------------|---------------------------|-------------------------------------------|----------------------------------------------|--------------------|-------------------|--------|---------------|
|                                 |                                                              |        |                                |                           | Mitochondrial membrane potential collapse | Fluorescence intensity (%)                   | 51.6±4.6 %         | 43.9±4.8% n=15    | p<0.01 |               |
|                                 |                                                              |        |                                |                           | Apoptotic rate                            | Bax/ Bcl-2 ratio                             | 22.3% <sup>v</sup> | 2.1x <sup>^</sup> | n=15   | p<0.01        |
|                                 |                                                              |        |                                |                           | Apoptotic rate                            | Cytochrome c release (AU)                    | 27.5% <sup>v</sup> | -                 | n=15   | p<0.01        |
| Oxotremorine-M                  | Muscarinic receptors                                         | ND     | camptothecin-induced           | SH-SY5Y                   | Apoptosis                                 | Caspase-3 activity                           | 75% <sup>v</sup>   |                   | n=16   | p<0.05 [101]  |
| Paeoniflorin                    | Oxidative stress and mitochondria (not yet fully delineated) | PD     | 6-OHDA induced                 | PC12 cells                | DNA fragmentation                         | Cytoplasmic histone-associated-DNA-fragments | 39% <sup>v</sup>   | -                 | n=15   | p<0.05 [102]  |
|                                 |                                                              |        |                                |                           | Oxidative stress                          | (DCFH-DA) 485/538nm                          | 9% <sup>v</sup>    | -                 | n=15   | p<0.05        |
|                                 |                                                              |        |                                |                           | Apoptosis                                 | % Annexin V+ cells                           | 16% <sup>v</sup>   | -                 | n=15   | p<0.05        |
|                                 |                                                              |        |                                |                           | Antioxidant system                        | GSH content (nmol/mg protein)                | 28% <sup>^</sup>   | -                 | n=15   | p<0.05        |
|                                 |                                                              | ND     |                                | differentiated PC12 cells | Cell viability                            | MTT (%)                                      | 7%                 | 58%               | n=9    | p<0.05 [103]  |
|                                 |                                                              |        |                                |                           |                                           | LDH release (%)                              | 87%                | 143%              | n=9    | p<0.01        |
|                                 |                                                              |        |                                |                           | Apoptosis                                 | Annexin V/PI (Q2+Q3)                         | 6.1%               | 16.8%             | n=9    | p<0.01        |
|                                 |                                                              |        |                                |                           | Calcium overload                          | Calcium levels (%)                           | 112%               | 144%              | n=9    | p<0.05        |
|                                 |                                                              |        |                                |                           | Apoptosis                                 | Cleaved PARP (intensity, %)                  | 55%                | 60%               | n=9    | p<0.05        |
|                                 |                                                              |        |                                |                           | Anti-Apoptotic protein family             | Bcl-xL (intensity, % of controls)            | 94%                | 21%               | n=9    | p<0.05        |
| PF9601N*                        | MAO-B                                                        | PD     | MPTP                           | SH-SY5Y cells             | Cell viability                            | MTT (%)                                      | 69.5 ± 2.3%        | 24.2 ± 1.5%       | n=27   | p<0.05 [104]  |
| P-coumaric acid (Corni fructus) | Apoptosis                                                    | AD     | Aβ(25–35)                      | PC12 cells                | Cell viability                            | MTT (%)                                      | 98.89 ± 7.61%      | 66.55 ± 2.84%     | n=12   | p<0.001 [105] |
|                                 |                                                              |        |                                |                           | Oxidative stress                          | ROS production CM-H2DCFDA (DCF fluorescence) | 68.86 ± 9.69%      | 100 ± 3.83%       | n=12   | p<0.001       |
| P. pavonica extract             | Oxidative stress                                             |        |                                |                           | Oxidative stress                          | H <sub>2</sub> O <sub>2</sub> production     | 208.74±5.09%       | 363.81±28.58%     | n=21   | p<0.05        |
| Q-VD-OPH                        | Caspases                                                     | PD, HD | MPTP, NP3 and malonate induced | Striatum                  | Neurotransmitter levels                   | Striatal dopamine (ng/ml protein)            | 200% <sup>^</sup>  | 30% <sup>v</sup>  | n=14   | p<0.05 [106]  |
|                                 |                                                              | VE     | Reovirus infected mice         | Brain slice cultures      | Viral induced injury                      | Viral induced injury                         | 35% <sup>v</sup>   | -                 | n=8    | p=0.008 [107] |

|                                    |                             |    |                          |                             |                                  |                                                          |                    |                    |      |         |       |
|------------------------------------|-----------------------------|----|--------------------------|-----------------------------|----------------------------------|----------------------------------------------------------|--------------------|--------------------|------|---------|-------|
| RBC1023                            | Caspase-3                   | ND | Staurosporine            | PC12 rat pheochromocytoma   | Cell viability                   | MTT*                                                     | 66%                | 4%                 | n=18 | p<0.01  | [108] |
|                                    | Caspase-3                   | ND |                          | U87MG human glioblastoma    |                                  | MTT                                                      | 71%                | 8%                 | n=18 | p<0.01  |       |
|                                    | Caspase-3                   | ND |                          | SH-SY5Y neuroblastoma cells |                                  | MTT                                                      | 47%                | 6%                 | n=18 | p<0.01  |       |
| Salidroside                        |                             |    |                          |                             |                                  | MTT                                                      | 67.1% <sup>^</sup> | 60.9% <sup>v</sup> | n=18 | p<0.05  | [89]  |
|                                    |                             |    |                          |                             |                                  | LDH release                                              | 34.3% <sup>v</sup> | 40.6% <sup>^</sup> | n=18 | p<0.05  |       |
|                                    |                             |    |                          |                             | Apoptotic rate                   | Apoptotic cell counts (%)                                | 64.2%              | 73.6%              | n=18 | p<0.01  |       |
|                                    |                             |    |                          |                             |                                  | Annexin V+/PI+                                           | 38.1%              | 55.1%              | n=18 | p<0.05  |       |
|                                    |                             |    |                          |                             |                                  | MTT                                                      | 5.2%               | 8.2%               | n=18 | p<0.05  |       |
| S. muticum extract                 | Oxidative stress            | PD | Dopamine induced         | SH-SY5Y cells               | Cell viability                   | MTT (% of control)                                       | 82.37±6.41%        | 56.41±5.05         | n=21 | p<0.05  | [76]  |
|                                    |                             |    |                          |                             | Mitochondrial membrane potential | monomers/aggregates JC1 (%)                              | 135.70±2.97%       | 191.17±6.52%       | n=21 | p<0.05  |       |
|                                    |                             |    |                          |                             | Apoptosis                        | Caspase-3 activity (fluorescence a.u.)/mg of protein/min | 2.53±2.49          | 66.46±1.49         | n=21 | p<0.05  |       |
| S. polyschides extract             | Oxidative stress            |    |                          |                             | Cell viability                   | MTT (%)                                                  | 89.26±8.62%        | 56.41±5.05         | n=21 | p<0.05  | [76]  |
|                                    |                             |    |                          |                             | Apoptosis                        | Caspase-3 activity (fluorescence a.u.)/mg of protein/min | 4.71±0.70          | 66.46±1.49         | n=21 | p<0.05  |       |
|                                    |                             |    |                          |                             | ATP levels                       | ATP levels (%)                                           | 1.2x <sup>^</sup>  | -                  | n=24 | p<0.01  |       |
|                                    |                             |    |                          |                             | MMP                              | ΔΨ <sub>mt</sub> (JC1, %)                                | 80%                | 50%                | n=24 | p<0.001 |       |
| TRP601*                            | Caspases 2/3                |    | Oxygen induced           | thalamic tissue             | Apoptosis                        | Caspase-3 activity                                       | 1,28               | 1,86               | n=18 | p<0.01  | [109] |
|                                    |                             |    |                          |                             |                                  | Caspase-2 activity                                       | 1,58               | 358%               | n=24 | p<0.01  |       |
| Trifluoperazine/W-7                | Calmodulin                  | ND | MG132-induced            | PC12 cells                  | Cell death                       | MTT (death counts)                                       | 47% <sup>v</sup>   | 55% <sup>^</sup>   | n=16 | p<0.05  | [110] |
| Tropisetron                        | Serotonergic system         | AD | β-amyloid (Aβ) rat model | Hippocampus                 | Proinflammatory cytokine         | TNFα (pg/mg protein)                                     | 59.428±8.2         | 148.773±10.3       | n=76 | p<0.001 | [111] |
| U. compressa extract               | Oxidative stress            |    |                          |                             | Mitochondrial membrane potential | Monomers/aggregates JC1 (%)                              | 126.73±5.46%       | 191.17±6.52%       | n=21 | p<0.05  | [76]  |
| Ursolic acid (Corni fructus)       | Oxidative stress            |    |                          |                             | Oxidative stress                 | ROS production CM-H2DCFDA (DCF fluorescence)             | 51.69 ± 2.88%      | 100 ± 3.83%        | n=12 | p<0.001 |       |
| Vanillyl alcohol (Gastrodia elata) | Oxidative stress, apoptosis | PD | MPTP                     | MN9D dopaminergic cells     | Cell viability                   | MTT (%)                                                  | 76.3 ± 4.6%        | 50.5 ± 1.4%        | n=18 | p<0.05  | [112] |

|                      |                       |     |                      |               |                             |                                           |                |                 |      |           |       |
|----------------------|-----------------------|-----|----------------------|---------------|-----------------------------|-------------------------------------------|----------------|-----------------|------|-----------|-------|
|                      |                       |     |                      |               | Apoptosis                   | PI (%)                                    | 16.8±2.8       | 37.6 ± 1.2%     | n=18 | p<0.05    |       |
|                      |                       |     |                      |               | Cell death signaling        | PARP proteolysis                          | 143.24 ± 7.97% | 251.14 ± 17.39% | n=18 | p<0.05    |       |
| XIAP and p35         | Caspases              | ALS | SOD1 transgenic mice |               | Mean survival               | Survival (days)                           | 276.6±6.4.8    | 258.96±4.1      | n=13 | p<0.001   | [113] |
|                      |                       |     |                      |               | Mean disease duration       | Death-onset (days)                        | 34.6±2.6       | 22.6 ±1.7       | n=13 | p<0.005   |       |
|                      |                       |     |                      |               | Surviving motor neurons     | Nº motor neurons ratio                    | 67.5±3.7 %     | 53.2±2.5%       | n=13 | p<0.01    |       |
| Z-VAD-FMK            | Caspases and calpains | ALS | Transgenic mice      | Mice          | Time before disease onset   | Days before disease onset                 | 123.76±6.8     | 103.56±2.8      | n=19 | p=0.048   | [19]  |
|                      |                       |     |                      |               | Time of survival            | Days of survival                          | 153.36±8.8     | 126.16±3.0      | n=19 | p=0.011   |       |
|                      |                       |     |                      |               | Time of survival            | Days of survival                          | 98.6           | 79              | n=5  | p=0.002   | [17]  |
|                      |                       |     |                      |               | Neuronal amount             | TH+ dopaminergic neurons                  | 17%^           | 38%^            | n=14 |           |       |
|                      |                       |     |                      |               | Cytochrome c oxidase        | COX levels (OD units)                     | 25.6±7.1 %     | 17.7±3.5%       | n=19 | p=0.007   | [114] |
|                      |                       |     |                      |               | Electroretinography         | Maximal b-wave amplitude (µV)             | 511±92         | 331±58          | n=34 | p = 0.003 | [115] |
|                      |                       |     |                      |               | Apoptosis                   | Nº apoptotic nuclei (inferior hemisphere) | 63%^           | 37.4±15.2       | n=8  | p<0.05    |       |
|                      |                       |     |                      |               |                             | Nº apoptotic nuclei (superior hemisphere) | 60%^           | 35.3±10.9       | n=8  | p<0.05    |       |
|                      |                       |     |                      |               | Nigral dopaminergic neurons | TH+ counts                                | 0.6            | 0.2             |      | p<0.01    | [116] |
| 11-dehydrosinuralide | Inflammation          | PD  | 6-OHDA induced       | SH-SY5Y cells | Cell viability              | Relative protection (%)                   | 15.8±7.3       | 0.0±3.5         | n=50 | p<0.05    | [117] |
|                      |                       |     |                      |               | Nuclear translocation rate  | NF-κB localized to the nucleus (% cells)  | 22.5±5.2 %     | 48.0±8.1%       | n=50 | p<0.05    |       |

3-NP, 3-Nitropropionic acid; 6-OHDA, 6-hydroxydopamine; Aβ 25-35, amyloid beta peptides; AD, Alzheimer's disease; ALS, amyotrophic lateral sclerosis; ATP, adenosine triphosphate, B355252, 4-chloro-N-(naphthalen-1-ylmethyl)-5-(3-(piperazin-1-yl)phenoxy)thiophene-2-sulfonamide; BAF, boc-aspartyl(OMe)fluoromethyl ketone; CAT, catalase; CGP 3466B, dibenzo[b,f]oxepin-10-ylmethyl-methyl-prop-2-ynyl-amine; CHA79, 2-iodo-40 -methoxychalcone; D, depression; GSH, glutathione; GST, glutathione transferase; Huntington's disease; iMACs, Mitochondrial Apoptotic Channel Inhibitors; JJDHYZ, Jia-Jian-Di-Huang-Yin-Zi decoction; LTP, long term potentiation; M40403, superoxide dismutase mimetic; MDA, malondialdehyde; MMP, mitochondrial membrane potential; MOMP, mitochondrial outer membrane permeabilization; MPTP, 1-methyl-4-phenyl-1,2,3,6-tetrahydropyridine; MSA, multiple system atrophy; MTT, 3-(4,5-dimethylthiazol-2-yl)-2,5-diphenyltetrazolium bromide; N-benzoyloxycarbonyl-valyl-alanyl-aspartyl-fluoromethylketone; ND, neurodegeneration; OD, Optical density; ON, optical neuropathy; PD, Parkinson's disease; PF9601N, [N-(2-propynyl)-2-(5-benzoyloxy-indolyl) methylamine]; PI, propidium iodide; ROS, reactive oxygen species; SOD, superoxide dismutase; SZ, schizophrenia; TH, tyrosine hydroxylase; TRP601, 5-(2,6-difluoro-phenoxy)-3(R,S)-(2(S)-(3-methoxycarbonyl-2(S)-(3-

---

methyl-2(S)-((quinoline-2-carbonyl)-amino)-butyrylamino)propionylamino)3-methylbutyrylamino)propionylamino)-4-oxo-pentanoic acid methyl ester; VE, viral encephalitis; ZVAD, Z-Val-Ala-Asp-CH<sub>2</sub>F.

**Supplementary Table S7.** Therapeutic approaches against SZ with compounds indirectly targeting apoptosis.

| Substance                       | Action/interaction                       | Conclusions                                                                                                                                                                          | References         |
|---------------------------------|------------------------------------------|--------------------------------------------------------------------------------------------------------------------------------------------------------------------------------------|--------------------|
| DHA, omega-3 fatty acids        | Antioxidant                              | Current data not conclusive and do not allow either to refuse or support the neuroprotective role of omega-3 fatty acids in SZ                                                       | [118]              |
| Erythropoietin                  | BDNF and other neurotrophins             | Effective in treating cognitive deficits associated with SZ                                                                                                                          | [119]              |
| Estradiol                       | Not fully established                    | Improvements in primary outcomes of childbearing age women                                                                                                                           | [120]              |
| Flavones                        | Antioxidant                              | Quercetin successfully augmented antipsychotic effects in treatment-resistant SZ. Hispidulin and morine attenuate SZ-like behaviors in SZ in animal models                           | [28], [121], [122] |
| Melatonin                       | Antioxidant                              | Clinical trial showed effective treatment for SZ sleep disorders, Tardive dyskinesia and Benzodiazepines discontinuation                                                             | [123]–[125]        |
| Memantine                       | N-methyl-D-aspartate receptor antagonist | Improvement of the verbal memory, learning, verbal letter fluency, and working memory without improvement on psychotic symptoms                                                      | [126]              |
| Minocycline (antibiotic)        | Caspases                                 | Amelioration of cognitive deficits that correlated with remission of negative symptoms, and reduction in serum levels of IL-1 $\beta$ and IL-6                                       | [127]              |
| N-acetylcysteine                | Antioxidant                              | Improvement in positive, negative, general and total psychopathology symptoms as well as cognitive performance. Antiapoptotic effects derived from NAC have been previously reported | [128], [129]       |
| Nicotinamide and nicotinic acid | Mitochondria                             | No evidence to support the hypothesis that either nicotinic acid or nicotinamide is useful as adjuvant therapy in the treatment                                                      | [130]              |
| Quercetin (flavone)             | Antioxidant/anti-inflammatory            | 2 case reports suggest effectiveness to augment antipsychotic treatment                                                                                                              | [121]              |
| Retinoic acid (bexarotene)      | Proteasome                               | Clinical trials with an add-on retinoid agonist (bexarotene) showed improvement of positive symptoms in SZ patients.                                                                 | [131]              |
| Sildenafil                      | Phosphodiesterase type 5 inhibitor       | Despite evidence for cognitive-enhancing effects of sildenafil in animal models, the strategy                                                                                        | [132]              |

---

|           |             |                                                                                                                                                                                                                                                  |             |
|-----------|-------------|--------------------------------------------------------------------------------------------------------------------------------------------------------------------------------------------------------------------------------------------------|-------------|
|           |             | for treating putative NMDA receptor-mediated memory deficits and depression in SZ was not successful. It is possible that the doses used in this study were not optimal or that repeated dosing may be necessary to achieve therapeutic effects. |             |
| Vitamin C | Antioxidant | Case reports, double-blind randomized clinical and open trials (46) indicate that the symptoms of chronic SZ can be ameliorated by high-dose ascorbic acid therapy                                                                               | [133]–[135] |

---



## References

1. Zhu, L.-F.; Wu, X.-Y.; Liu, X.; Ma, L.; Zhang, Q.; Yu, Z.; He, Z.-J.; Ying, Y.; Zhang, Z.-T.; Pan, X.-Y.; et al. Absence of BAX differentially affects astrocyte density in the mouse cortex and hippocampus. *Sheng Li Xue Bao Acta Physiol. Sin.* **2021**, *73*, 1–9.
2. D'Orsi, B.; Kilbride, S.M.; Chen, G.; Alvarez, S.P.; Bonner, H.P.; Pfeiffer, S.; Plesnila, N.; Engel, T.; Henshall, D.C.; Düsman, H.; et al. Bax Regulates Neuronal Ca<sup>2+</sup> Homeostasis. *J. Neurosci.* **2015**, *35*, 1706–1722. <https://doi.org/10.1523/jneurosci.2453-14.2015>.
3. Smith, M.I.; Deshmukh, M. Endoplasmic reticulum stress-induced apoptosis requires bax for commitment and Apaf-1 for execution in primary neurons. *Cell Death Differ.* **2007**, *14*, 1011–1019. <https://doi.org/10.1038/sj.cdd.4402089>.
4. Wyttenbach, A.; Tolkovsky, A.M. The BH3-only protein Puma is both necessary and sufficient for neuronal apoptosis induced by DNA damage in sympathetic neurons. *J. Neurochem.* **2006**, *96*, 1213–1226. <https://doi.org/10.1111/j.1471-4159.2005.03676.x>.
5. Vila, M.; Jackson-Lewis, V.; Vukosavic, S.; Djaldetti, R.; Liberatore, G.; Offen, D.; Korsmeyer, S.J.; Przedborski, S. Bax ablation prevents dopaminergic neurodegeneration in the 1-methyl-4-phenyl-1,2,3,6-tetrahydropyridine mouse model of Parkinson's disease. *Proc Natl Acad Sci U S A.* **2001**, *98*, 2837–42. doi: 10.1073/pnas.051633998
6. Johnson, M.D.; Xiang, H.; London, S.; Kinoshita, Y.; Knudson, M.; Mayberg, M.; Korsmeyer, S.J.; Morrison, R.S. Evidence for involvement of Bax and p53, but not caspases, in radiation-induced cell death of cultured postnatal hippocampal neurons. *J. Neurosci. Res.* **1998**, *54*, 721–733. [https://doi.org/10.1002/\(SICI\)1097-4547\(19981215\)54:6<721::AID-JNR1>3.0.CO;2-1](https://doi.org/10.1002/(SICI)1097-4547(19981215)54:6<721::AID-JNR1>3.0.CO;2-1).
7. Miller, T.M.; Moulder, K.L.; Knudson, C.M.; Creedon, D.J.; Deshmukh, M.; Korsmeyer, S.J.; Johnson, E.M. Bax Deletion Further Orders the Cell Death Pathway in Cerebellar Granule Cells and Suggests a Caspase-independent Pathway to Cell Death. *J. Cell Biol.* **1997**, *139*, 205–217. <https://doi.org/10.1083/jcb.139.1.205>.
8. White, F.A.; Keller-Peck, C.R.; Knudson, C.M.; Korsmeyer, S.J.; Snider, W.D. Widespread Elimination of Naturally Occurring Neuronal Death in Bax-Deficient Mice. *J. Neurosci.* **1998**, *18*, 1428–1439. <https://doi.org/10.1523/jneurosci.18-04-01428.1998>.
9. Kwon, Y.; Shin, J.; Nam, K.; An, J.S.; Yang, S.; Hong, S.; Bae, M.; Moon, K.; Cho, Y.; Woo, J.; et al. Rhizolutin, a Novel 7/10/6-Tricyclic Dilactone, Dissociates Misfolded Protein Aggregates and Reduces Apoptosis/Inflammation Associated with Alzheimer's Disease. *Angew. Chem. Int. Ed.* **2020**, *59*, 22994–22998. <https://doi.org/10.1002/anie.202009294>.
10. Rohn, T.T.; Kokoulina, P.; Eaton, C.R.; Poon, W.W. Caspase activation in transgenic mice with Alzheimer-like pathology: Results from a pilot study utilizing the caspase inhibitor, Q-VD-OPh. *Int. J. Clin. Exp. Med.* **2009**, *2*, 300–308.
11. Duan, W.; Zhu, X.; Ladenheim, B.; Yu, Q.-S.; Guo, Z.; Oyler, J.; Cutler, R.G.; Cadet, J.L.; Greig, N.H.; Mattson, M.P. p53 inhibitors preserve dopamine neurons and motor function in experimental parkinsonism. *Ann Neurol.* **2002**, *52*, 597–606. <https://doi.org/10.1002/ana.10350>
12. Vila, M.; Przedborski, S. Targeting programmed cell death in neurodegenerative diseases. *Nat Rev Neurosci.* **2003**, *4*, 365–375. <https://doi.org/10.1038/nrn1100>
13. Teismann, P.; Tieu, K.; Choi, D.-K.; Wu, D.-C.; Naini, A.; Hunot, S.; Vila, M.; Jackson-Lewis, V.; Przedborski, S. Cyclooxygenase-2 is instrumental in Parkinson's disease neurodegeneration. *Proc. Natl. Acad. Sci. USA* **2003**, *100*, 5473–5478. <https://doi.org/10.1073/pnas.0837397100>.
14. Du, Y.; Ma, Z.; Lin, S.; Dodel, R. C.; Gao, F.; Bales, K. R.; Triarhou, L. C.; Chernet, E.; Perry, K. W.; Nelson, D. L.; Luecke, S.; Phebus, L. A.; Bymaster, F. P.; & Paul, S. M.. Minocycline prevents nigrostriatal dopaminergic neurodegeneration in the MPTP model of Parkinson's disease. *Proc Natl Acad Sci U S A.* **2001**, *98*, 14669–74
15. Kanthasamy, A.G.; Anantharam, V.; Zhang, D.; Latchoumycandane, C.; Jin, H.; Kaul, S.; Kanthasamy, A. A novel peptide inhibitor targeted to caspase-3 cleavage site of a proapoptotic kinase protein kinase C delta (PKCδ) protects against dopaminergic neuronal degeneration in Parkinson's disease models. *Free Radic. Biol. Med.* **2006**, *41*, 1578–1589. <https://doi.org/10.1016/j.freeradbiomed.2006.08.016>.
16. Ganjam, G.K.; Bolte, K.; Matschke, L.A.; Neitemeier, S.; Dolga, A.; Höllerhage, M.; Höglinger, G.; Adamczyk, A.; Decher, N.; Oertel, W.H.; et al. Mitochondrial damage by α-synuclein causes cell death in human dopaminergic neurons. *Cell Death Dis.* **2019**, *10*, 865. <https://doi.org/10.1038/s41419-019-2091-2>.
17. Ona, V.; Li, M.; Vonsattel, J. et al. Inhibition of caspase-1 slows disease progression in a mouse model of Huntington's disease. *Nature* **1999**, *399*, 263–267. <https://doi.org/10.1038/20446>
18. Aharony, I.; Ehrnhoefer, D.E.; Shruster, A.; Qiu, X.; Franciosi, S.; Hayden, M.; Offen, D. A Huntingtin-based peptide inhibitor of caspase-6 provides protection from mutant Huntingtin-induced motor and behavioral deficits. *Hum. Mol. Genet.* **2015**, *24*, 2604–2614. <https://doi.org/10.1093/hmg/ddv023>.
19. Li, M.; Ona, V. O.; Guégan, C.; Chen, M.; Jackson-Lewis, V.; Andrews, L. J.; Olszewski, A. J.; Stieg, P. E.; Lee, J. P.; Przedborski, S.; & Friedlander, R. M. Functional role of caspase-1 and caspase-3 in an ALS transgenic mouse model. *Science*. **2000**, *288*, 335–9. doi: 10.1126/science.288.5464.335.
20. Zhu, S.; Stavrovskaya, I.; Drozda, M. et al. Minocycline inhibits cytochrome c release and delays progression of amyotrophic lateral sclerosis in mice. *Nature* **2002**, *417*, 74–78. <https://doi.org/10.1038/417074a>

21. Ahn, S.-W.; Jeon, G.S.; Kim, M.-J.; Shon, J.-H.; Kim, J.-E.; Shin, J.-Y.; Kim, S.-M.; Kim, S.H.; Ye, I.-H.; Lee, K.-W.; et al. Neuroprotective effects of JGK-263 in transgenic SOD1-G93A mice of amyotrophic lateral sclerosis. *J. Neurol. Sci.* **2014**, *340*, 112–116. <https://doi.org/10.1016/j.jns.2014.03.008>.
22. Hawking, Z.L. Alzheimer's disease: The role of mitochondrial dysfunction and potential new therapies: The International Journal of Student Research. *Biosci. Horizons* **2016**, *9*, hzw014. <https://doi.org/10.1093/biohorizons/hzw014>.
23. Wu, Y.; Chen, M.; & Jiang, J. Mitochondrial dysfunction in neurodegenerative diseases and drug targets via apoptotic signaling. *Mitochondrion*. **2019**, *49*, 35–45. doi: 10.1016/j.mito.2019.07.003.
24. Tewari, D.; Stankiewicz, A. M.; Mocan, A.; Sah, A. N.; Tzvetkov, N. T.; Huminiecki, L.; Horbańczuk, J. O.; & Atanasov, A. G. Ethnopharmacological Approaches for Dementia Therapy and Significance of Natural Products and Herbal Drugs. *Front Aging Neurosci.* **2018**, *10*, 3. doi: 10.3389/fnagi.2018.00003.
25. Rajasekaran, A.; Venkatasubramanian, G.; Berk, M.; & Debnath, M. Mitochondrial dysfunction in schizophrenia: pathways, mechanisms and implications. *Neurosci Biobehav Rev.* **2015**, *48*, 10–21. doi: 10.1016/j.neubiorev.2014.11.005.
26. Moreira, P.I.; Carvalho, C.; Zhu, X.; Smith, M.A.; Perry, G. Mitochondrial dysfunction is a trigger of Alzheimer's disease pathophysiology. *Biochim. Biophys. Acta Mol. Basis Dis.* **2010**, *1802*, 2–10. <https://doi.org/10.1016/j.bbadis.2009.10.006>.
27. Picone, P.; Nuzzo, D.; Caruana, L.; Scafidi, V.; & Di Carlo, M. Mitochondrial dysfunction: different routes to Alzheimer's disease therapy. *Oxid Med Cell Longev.* **2014**, 780179. doi: 10.1155/2014/780179.
28. Song, G.; Li, Y.; Lin, L.; & Cao, Y. Anti-autophagic and anti-apoptotic effects of memantine in a SH-SY5Y cell model of Alzheimer's disease via mammalian target of rapamycin-dependent and -independent pathways. *Mol Med Rep* **2015**, *12*, 7615–7622.
29. Sun, X.-Q.; Zhang, R.; Zhang, H.-D.; Yuan, P.; Wang, X.-J.; Zhao, Q.-H.; Wang, L.; Jiang, R.; Bogaard, H.J.; Jing, Z.-C. Reversal of right ventricular remodeling by dichloroacetate is related to inhibition of mitochondria-dependent apoptosis. *Hypertens. Res.* **2016**, *39*, 302–311. <https://doi.org/10.1038/hr.2015.153>.
30. Macdonald, R.; Barnes, K.; Hastings, C.; Mortiboys, H. Mitochondrial abnormalities in Parkinson's disease and Alzheimer's disease: Can mitochondria be targeted therapeutically? *Biochem. Soc. Trans.* **2018**, *46*, 891–909. <https://doi.org/10.1042/bst20170501>.
31. Park, J. S.; Davis, R. L.; & Sue, C. M. Mitochondrial Dysfunction in Parkinson's Disease: New Mechanistic Insights and Therapeutic Perspectives. *Curr Neurol Neurosci Rep.* **2018**, *18*, 21. doi: 10.1007/s11910-018-0829-3.
32. Flatters, S.J. The Contribution of Mitochondria to Sensory Processing and Pain. *Prog. Mol. Biol. Transl. Sci.* **2015**, *131*, 119–146. <https://doi.org/10.1016/bs.pmbts.2014.12.004>.
33. Smith, E.F.; Shaw, P.J.; De Vos, K.J. The role of mitochondria in amyotrophic lateral sclerosis. *Neurosci. Lett.* **2019**, *710*, 132933. <https://doi.org/10.1016/j.neulet.2017.06.052>.
34. Patergnani, S.; Fossati, V.; Bonora, M.; Giorgi, C.; Marchi, S.; Missiroli, S.; Rusielewicz, T.; Wieckowski, M.; Pinton, P. Mitochondria in Multiple Sclerosis: Molecular Mechanisms of Pathogenesis. *Int. Rev. Cell. Mol. Biol.* **2017**, *328*, 49–103. <https://doi.org/10.1016/bs.ircmb.2016.08.003>.
35. Marchionini, D.M.; Collier, T.J.; Pitzer, M.R.; Sortwell, C.E. Reassessment of caspase inhibition to augment grafted dopamine neuron survival. *Cell Transplant.* **2004**, *13*, 273–282. <https://doi.org/10.3727/000000004783983972>.
36. Gray, J.; Haran, M. M.; Schneider, K.; Vesce, S.; Ray, A. M.; Owen, D.; White, I. R.; Cutler, P.; & Davis, J. B. Evidence that inhibition of cathepsin-B contributes to the neuroprotective properties of caspase inhibitor Tyr-Val-Ala-Asp-chloromethyl ketone. *J Biol Chem.* **2001**, *276*, 32750–5. doi: 10.1074/jbc.M103150200.
37. Sivasangari, K.; Rajan, K.E. Standardized *Bacopa monnieri* Extract Ameliorates Learning and Memory Impairments through Synaptic Protein, Neurogranin, Pro-and Mature BDNF Signaling, and HPA Axis in Prenatally Stressed Rat Offspring. *Antioxidants* **2020**, *9*, 1229. <https://doi.org/10.3390/antiox9121229>.
38. Lee, J.-E.; Sim, H.; Yoo, H.M.; Lee, M.; Baek, A.; Jeon, Y.-J.; Seo, K.-S.; Son, M.-Y.; Yoon, J.S.; Kim, J. Neuroprotective Effects of Cryptotanshinone in a Direct Reprogramming Model of Parkinson's Disease. *Molecules* **2020**, *25*, 3602. <https://doi.org/10.3390/molecules25163602>.
39. Pillai, A.; Veeranan-Karmegam, R.; Dhandapani, K. M.; & Mahadik, S. P. Cystamine prevents haloperidol-induced decrease of BDNF/TrkB signaling in mouse frontal cortex. *J Neurochem.* **2008**, *107*, 941–51. doi: 10.1111/j.1471-4159.2008.05665.x.
40. Eckert, G. P.; Chang, S.; Eckmann, J.; Copanaki, E.; Hagl, S.; Hener, U.; Müller, W. E.; & Kögel, D. Liposome-incorporated DHA increases neuronal survival by enhancing non-amyloidogenic APP processing. *Biochim Biophys Acta.* **2011**, *1808*, 236–43. doi: 10.1016/j.bbamem.2010.10.014.
41. Ravishankar, D.; Corona, G.; Hogan, S.M.; Spencer, J.P.; Greco, F.; Osborn, H.M. Thioflavones as novel neuroprotective agents. *Bioorganic Med. Chem.* **2016**, *24*, 5513–5520. <https://doi.org/10.1016/j.bmc.2016.09.006>.
42. Pillai, A.; Dhandapani, K. M.; Pillai, B. A.; Terry, A. V., Jr.; & Mahadik, S. P. Erythropoietin prevents haloperidol treatment-induced neuronal apoptosis through regulation of BDNF. *Neuropsychopharmacology.* **2008**, *33*, 1942–51. doi: 10.1038/sj.npp.1301566.
43. Li, H.; Wang, B.; Zhu, C.; Feng, Y.; Wang, S.; Shahzad, M.; Hu, C.; Mo, M.; Du, F.; & Yu, X. 17 $\beta$ -estradiol impedes Bax-involved mitochondrial apoptosis of retinal nerve cells induced by oxidative damage via the phosphatidylinositol 3-kinase/Akt signal pathway. *J Mol Neurosci.* **2013**, *50*, 482–93. doi: 10.1007/s12031-013-9968-9.

44. Nuñez-Figueroa, Y.; Pardo-Andreu, G.L.; Ramírez-Sánchez, J.; Delgado-Hernández, R.; Ochoa-Rodríguez, E.; Verdecia-Reyes, Y.; Naal, Z.; Muller, A.P.; Portela, L.V.; Souza, D.O. Antioxidant effects of JM-20 on rat brain mitochondria and synaptosomes: Mitoprotection against Ca<sup>2+</sup>-induced mitochondrial impairment. *Brain Res. Bull.* **2014**, *109*, 68–76. <https://doi.org/10.1016/j.brainresbull.2014.10.001>.
45. Momeni, H.R.; Kanje, M. Calpain inhibitors delay injury-induced apoptosis in adult mouse spinal cord motor neurons. *Neuroreport* **2006**, *17*, 761–765. <https://doi.org/10.1097/01.wnr.0000220127.01597.04>.
46. Liu, W., Jalewa, J., Sharma, M., Li, G., Li, L., & Hölscher, C. Neuroprotective effects of lixisenatide and liraglutide in the 1-methyl-4-phenyl-1,2,3,6-tetrahydropyridine mouse model of Parkinson's disease. *Neuroscience* **2015**, *303*, 42–50. doi: 10.1016/j.neuroscience.2015.06.054.
47. Manigandan, V.; Nataraj, J.; Karthik, R.; Manivasagam, T.; Saravanan, R.; Thenmozhi, A.J.; Essa, M.M.; Guillemain, G.J. Low Molecular Weight Sulfated Chitosan: Neuroprotective Effect on Rotenone-Induced In Vitro Parkinson's Disease. *Neurotox. Res.* **2019**, *35*, 505–515. <https://doi.org/10.1007/s12640-018-9978-z>.
48. Sharif, R., Aghsami, M., Gharghabi, M., Sanati, M., Khorshid Ahmad, T., Vakilzadeh, G., Mehdizadeh, H., Gholizadeh, S., Taghizadeh, G., & Sharifzadeh, M. Melatonin reverses H-89 induced spatial memory deficit: Involvement of oxidative stress and mitochondrial function. *Behav Brain Res.* **2017**, *316*, 115–124. doi: 10.1016/j.bbr.2016.08.040.
49. Casarejos, M.J.; Menéndez, J.; Solano, R.M.; Rodríguez-Navarro, J.A.; De Yébenes, J.G.; Mena, M.A. Susceptibility to rotenone is increased in neurons from parkin null mice and is reduced by minocycline. *J. Neurochem.* **2006**, *97*, 934–946. <https://doi.org/10.1111/j.1471-4159.2006.03777.x>.
50. Sirianni, A.C.; Jiang, J.; Zeng, J.; Mao, L.L.; Zhou, S.; Sugarbaker, P.; Zhang, X.; Li, W.; Friedlander, R.M.; Wang, X. N-acetyl-L-tryptophan, but not N-acetyl-D-tryptophan, rescues neuronal cell death in models of amyotrophic lateral sclerosis. *J. Neurochem.* **2015**, *134*, 956–968. <https://doi.org/10.1111/jnc.13190>.
51. Ullah, N., Ullah, I., Lee, H. Y., Naseer, M. I., Seok, P. M., Ahmed, J., & Kim, M. O. Protective function of nicotinamide against ketamine-induced apoptotic neurodegeneration in the infant rat brain. *J Mol Neurosci.* **2012**, *47*, 67–75. doi: 10.1007/s12031-011-9685-1.
52. Mookherjee, P.; Johnson, G.V. Tau phosphorylation during apoptosis of human SH-SY5Y neuroblastoma cells. *Brain Res.* **2001**, *921*, 31–43. [https://doi.org/10.1016/s0006-8993\(01\)03074-8](https://doi.org/10.1016/s0006-8993(01)03074-8).
53. Liu, W., Li, Y., Jalewa, J., Saunders-Wood, T., Li, L., & Hölscher, C. Neuroprotective effects of an oxyntomodulin analogue in the MPTP mouse model of Parkinson's disease. *Eur J Pharmacol.* **2015**, *765*, 284–90. doi: 10.1016/j.ejphar.2015.08.038.
54. Gu, C.; Zhang, Y.; Hu, Q.; Wu, J.; Ren, H.; Liu, C.-F.; Wang, G. P7C3 inhibits GSK3 $\beta$  activation to protect dopaminergic neurons against neurotoxin-induced cell death in vitro and in vivo. *Cell Death Dis.* **2017**, *8*, e2858. <https://doi.org/10.1038/cddis.2017.250>.
55. Hu, X.; Weng, Z.; Chu, C.; Zhang, L.; Cao, G.; Gao, Y.; Signore, A.; Zhu, J.; Hastings, T.; Greenamyre, J.T.; et al. Peroxiredoxin-2 Protects against 6-Hydroxydopamine-Induced Dopaminergic Neurodegeneration via Attenuation of the Apoptosis Signal-Regulating Kinase (ASK1) Signaling Cascade. *J. Neurosci.* **2011**, *31*, 247–261. <https://doi.org/10.1523/jneurosci.4589-10.2011>.
56. Squitieri, F.; Di Pardo, A.; Favellato, M.; Amico, E.; Maglione, V.; Frati, L. Pridopidine, a dopamine stabilizer, improves motor performance and shows neuroprotective effects in Huntington disease R6/2 mouse model. *J Cell Mol Med*, **2015**, *19*, 2540–2548. doi: 10.1111/jcmm.12604.
57. Selvakumar, K.; Bavithra, S.; Suganthi, M.; Benson, C.S.; Elumalai, P.; Arunkumar, R.; Krishnamoorthy, G.; Venkataraman, P.; Arunakaran, J. Protective Role of Quercetin on PCBs-Induced Oxidative Stress and Apoptosis in Hippocampus of Adult Rats. *Neurochem. Res.* **2012**, *37*, 708–721. <https://doi.org/10.1007/s11064-011-0661-5>.
58. Cheng, B., Martinez, A.A., Morado, J., Scofield, V., Roberts, J.L., Maffi, S.K. Retinoic acid protects against proteasome inhibition associated cell death in SH-SY5Y cells via the AKT pathway. *Neurochem Int*, **2012**, *62*, 31–42. doi: 10.1016/j.neuint.2012.10.014.
59. Duarte-Silva, E.; Araújo, S.; Oliveira, W. H., Lós, D. B., França, M., Bonfanti, A. P., Peron, G., Thomaz, L. L., Verinaud, L., Nunes, A., & Peixoto, C. A. Sildenafil ameliorates EAE by decreasing apoptosis in the spinal cord of C57BL/6 mice. *J Neuroimmunol.* **2018**, *321*, 125–137. doi: 10.1016/j.jneuroim.2018.06.002.
60. Tai, J., Liu, W., Li, Y., Li, L., Hölscher, C. Neuroprotective effects of a triple GLP-1/GIP/glucagon receptor agonist in the APP/PS1 transgenic mouse model of Alzheimer's disease. *Brain Res*, **2017**, *1678*, 64–74. doi: 10.1016/j.brainres.2017.10.012.
61. Timpe, J.M., Wang, C.Z., Kim, J., Johnson, K.M.  $\alpha$ -amino-3-hydroxy-5-methyl-4-isoxazolepropionic acid receptor activation protects against phencyclidine-induced caspase-3 activity by activating voltage-gated calcium channels. *J Neurosci Res.* **2014**, *92*, 1785–1791. doi: 10.1002/jnr.23446.
62. Shoshan-Barmatz, V.; Nahon-Crystal, E.; Shteinberg-Kuzmine, A.; Gupta, R. VDAC1, mitochondrial dysfunction, and Alzheimer's disease. *Pharmacol. Res.* **2018**, *131*, 87–101. <https://doi.org/10.1016/j.phrs.2018.03.010>.
63. Deleglise, B.; Lassus, B.; Soubeyre, V.; Alleaume-Butaux, A.; Hjorth, J.J.; Vignes, M.; Schneider, B.; Brugg, B.; Viovy, J.-L.; Peyrin, J.-M. Synapto-Protective Drugs Evaluation in Reconstructed Neuronal Network. *PLoS ONE* **2013**, *8*, e71103. <https://doi.org/10.1371/journal.pone.0071103>.

64. Liu, Y.; Wang, W.; Li, Y.; Xiao, Y.; Cheng, J.; Jia, J. The 5-Lipoxygenase Inhibitor Zileuton Confers Neuroprotection against Glutamate Oxidative Damage by Inhibiting Ferroptosis. *Biol. Pharm. Bull.* **2015**, *38*, 1234–1239. <https://doi.org/10.1248/bpb.b15-00048>.
65. Gómez, C.; Reiriz, J.; Piqué, M.; Gil, J.; Ferrer, I.; Ambrosio, S. Low concentrations of 1-methyl-4-phenylpyridinium ion induce caspase-mediated apoptosis in human SH-SY5Y neuroblastoma cells. *J. Neurosci. Res.* **2001**, *63*, 421–428. [https://doi.org/10.1002/1097-4547\(20010301\)63:5<421::AID-JNR1037>3.0.CO;2-4](https://doi.org/10.1002/1097-4547(20010301)63:5<421::AID-JNR1037>3.0.CO;2-4).
66. Thompson, C.K.; Brenowitz, E.A. Caspase inhibitor infusion protects an avian song control circuit from seasonal-like neurodegeneration. *J. Neurosci.* **2008**, *28*, 7130–7136. doi: 10.1523/JNEUROSCI.0663-08.2008.
67. Gallego-Sandín, S.; Novalbos, J.; Rosado, A.; Cano-Abad, M. F.; Arias, E.; Abad-Santos, F., & García, A. G. Albumin prevents mitochondrial depolarization and apoptosis elicited by endoplasmic reticulum calcium depletion of neuroblastoma cells. *Eur J Pharmacol.* **2005**, *520*, 1–11. doi: 10.1016/j.ejphar.2005.06.044.
68. Mukhopadhyay, D.; Hammami, M.; Khalouf, A.; Al Shaikh, Y.; Mohammed, A.K.; Hamad, M.; Salehi, A.; Taneera, J. Dimethylxylglycine (DMOG) and the Caspase Inhibitor “Ac-LETD-CHO” Protect Neuronal ND7/23 Cells of Glucotoxicity. *Exp. Clin. Endocrinol. Diabetes* **2021**, *129*, 420–428. <https://doi.org/10.1055/a-0919-4489>.
69. Ullah, I.; Park, H.Y.; Kim, M.O. Anthocyanins Protect against Kainic Acid-induced Excitotoxicity and Apoptosis via ROS-activated AMPK Pathway in Hippocampal Neurons. *CNS Neurosci. Ther.* **2014**, *20*, 327–338. <https://doi.org/10.1111/cns.12218>.
70. Nataraj, J.; Manivasagam, T.; Justin Thenmozhi, A.; Essa, M.M. Neuroprotective effect of asiatic acid on rotenone-induced mitochondrial dysfunction and oxidative stress-mediated apoptosis in differentiated SH-SY5Y cells. *Nutr Neurosci.* **2017**, *20*, 351–359. doi: 10.1080/1028415X.2015.1135559.
71. Song, D.; Jiang, X.; Liu, Y.; Sun, Y.; Cao, S.; Zhang, Z. Asiaticoside Attenuates Cell Growth Inhibition and Apoptosis Induced by A $\beta$ 1-42 via Inhibiting the TLR4/NF- $\kappa$ B Signaling Pathway in Human Brain Microvascular Endothelial Cells. *Front. Pharmacol.* **2018**, *9*, 28. <https://doi.org/10.3389/fphar.2018.00028>.
72. Werth, J.L.; Deshmukh, M.; Cocabo, J.; Johnson, E.M.; Rothman, S.M. Reversible Physiological Alterations in Sympathetic Neurons Deprived of NGF but Protected from Apoptosis by Caspase Inhibition or Bax Deletion. *Exp. Neurol.* **2000**, *161*, 203–211. <https://doi.org/10.1006/exnr.1999.7241>.
73. Jung, E.B.; Lee, C.S. Baicalein attenuates proteasome inhibition-induced apoptosis by suppressing the activation of the mitochondrial pathway and the caspase-8- and Bid-dependent pathways. *Eur. J. Pharmacol.* **2014**, *730*, 116–124. <https://doi.org/10.1016/j.ejphar.2014.02.039>.
74. Liu, X.-Y.; Zhang, L.-J.; Chen, Z.; Liu, L.-B. The PTEN inhibitor bpV(pic) promotes neuroprotection against amyloid  $\beta$ -peptide (25-35)-induced oxidative stress and neurotoxicity. *Neurol Res.* **2017**, *39*, 758–765. doi: 10.1080/01616412.2017.1317916.
75. Gliyazova, N.S.; Ibeanu, G.C. The Chemical Molecule B355252 is Neuroprotective in an In Vitro Model of Parkinson’s Disease. *Cell. Mol. Neurobiol.* **2016**, *36*, 1109–1122. <https://doi.org/10.1007/s10571-015-0304-5>.
76. Silva, J.; Alves, C.; Pinteus, S.; Mendes, S.; Pedrosa, R. Seaweeds’ neuroprotective potential set in vitro on a human cellular stress model. *Mol. Cell. Biochem.* **2020**, *473*, 229–238. <https://doi.org/10.1007/s11010-020-03824-5>.
77. Sagot, Y.; Toni, N.; Perrelet, D.; Lurot, S.; King, B.; Rixner, H.; Mattenberger, L.; Waldmeier, P. C., & Kato, A. C. An orally active anti-apoptotic molecule (CGP 3466B) preserves mitochondria and enhances survival in an animal model of motoneuron disease. *Br J Pharmacol.* **2000**, *131*, 721–8. doi: 10.1038/sj.bjp.0703633.
78. Tseng, Y.-T.; Tsai, Y.-H.; Fülöp, F.; Chang, F.-R.; Lo, Y.-C. 2-Iodo-4'-Methoxychalcone Attenuates Methylglyoxal-Induced Neurotoxicity by Activation of GLP-1 Receptor and Enhancement of Neurotrophic Signal, Antioxidant Defense and Glyoxalase Pathway. *Molecules* **2019**, *24*, 2249. <https://doi.org/10.3390/molecules24122249>.
79. Zhang, X.; Boulton, A.A.; Zuo, D.-M.; Yu, P.H. MK-801 induces apoptotic neuronal death in the rat retrosplenial cortex: Prevention by cycloheximide and R(?) -2-Hexyl-N- Methylpropargylamine. *J. Neurosci. Res.* **1996**, *46*, 82–89. [https://doi.org/10.1002/\(sici\)1097-4547\(19961001\)46:1<82::aid-jnr10>3.0.co;2-e](https://doi.org/10.1002/(sici)1097-4547(19961001)46:1<82::aid-jnr10>3.0.co;2-e).
80. El-Sahar, A. E.; Rastanawi, A. A.; El-Yamany, M. F.; Saad, M. A. Dapagliflozin improves behavioral dysfunction of Huntington’s disease in rats via inhibiting apoptosis-related glycolysis. *Life Sci.* **2020**, *257*, 118076. doi: 10.1016/j.lfs.2020.118076.
81. Rosenstock, T. R.; de Brito, O. M.; Lombardi, V.; Louros, S.; Ribeiro, M.; Almeida, S.; Ferreira, I. L.; Oliveira, C. R., & Rego, A. C. FK506 ameliorates cell death features in Huntington’s disease striatal cell models. *Neurochem Int.* **2011**, *59*, 600–9. doi: 10.1016/j.neuint.2011.04.009.
82. Huang, C.; Lin, Y.; Su, H.; Ye, D. Forsythiaside Protects Against Hydrogen Peroxide-Induced Oxidative Stress and Apoptosis in PC12 Cell. *Neurochem. Res.* **2015**, *40*, 27–35. <https://doi.org/10.1007/s11064-014-1461-5>.
83. Wei, H.; Gao, Z.; Zheng, L.; Zhang, C.; Liu, Z.; Yang, Y.; Teng, H.; Hou, L.; Yin, Y., & Zou, X. Protective Effects of Fucoidan on A $\beta$ 25-35 and d-Gal-Induced Neurotoxicity in PC12 Cells and d-Gal-Induced Cognitive Dysfunction in Mice. *Mar Drugs.* **2017**, *15*, 77. doi: 10.3390/md15030077.
84. Song, D.H.; Kim, G.-J.; Lee, K.J.; Shin, J.S.; Kim, D.-H.; Park, B.-J.; An, J.H. Mitigation Effects of a Novel Herbal Medicine, Hepad, on Neuroinflammation, Neuroapoptosis, and Neuro-Oxidation. *Molecules* **2018**, *23*, 2920. <https://doi.org/10.3390/molecules23112920>.

85. Peixoto, P.M.; Teijido, O.; Mirzalieva, O.; Dejean, L.M.; Pavlov, E.V.; Antonsson, B.; Kinnally, K.W. MAC inhibitors antagonize the pro-apoptotic effects of tBid and disassemble Bax / Bak oligomers. *J. Bioenerg. Biomembr.* **2017**, *49*, 65–74. <https://doi.org/10.1007/s10863-015-9635-7>.
86. Zhang, J.; Zhang, Z.; Bao, J.; Yu, Z.; Cai, M.; Li, X.; Wu, T.; Xiang, J.; & Cai, D.
87. Wong-Guerra, M.; Jiménez-Martin, J.; Fonseca-Fonseca, L. A.; Ramírez-Sánchez, J.; Montano-Peguero, Y.; Rocha, J. B.; D Avila, F.; de Assis, A. M.; Souza, D. O.; Pardo-Andreu, et al. JM-20 protects memory acquisition and consolidation on scopolamine model of cognitive impairment. *Neurol Res.* **2019**, *41*, 385–398. doi: 10.1080/01616412.2019.1573285.
88. Busquets, O.; Ettcheto, M.; Verdaguer, E.; Castro-Torres, R.D.; Auladell, C.; Beas-Zarate, C.; Folch, J.; Camins, A. JNK1 inhibition by Licochalcone A leads to neuronal protection against excitotoxic insults derived of kainic acid. *Neuropharmacology* **2018**, *131*, 440–452. <https://doi.org/10.1016/j.neuropharm.2017.10.030>.
89. Xian, H.; Zhao, J.; Zheng, Y.; Wang, M.; Huang, J.; Wu, B.; Sun, C.; Yang, Y. MADP, a salidroside analog, protects hippocampal neurons from glutamate induced apoptosis. *Life Sci.* **2014**, *103*, 34–40. <https://doi.org/10.1016/j.lfs.2014.02.040>.
90. Zhou, L.; Flores, J.; Noël, A.; Beauchet, O.; Sjöström, P. J.; & LeBlanc, A. C. Methylene blue inhibits Caspase-6 activity, and reverses Caspase-6-induced cognitive impairment and neuroinflammation in aged mice. *Acta Neuropathol Commun.* **2019**, *7*, 210. doi: 10.1186/s40478-019-0856-6.
91. El-Mir, M.-Y.; Detaillé, D.; R-Villanueva, G.; Esteban, M.D.; Guigas, B.; Attia, S.; Fontaine, E.; Almeida, A.; Leverve, X. Neuroprotective Role of Antidiabetic Drug Metformin Against Apoptotic Cell Death in Primary Cortical Neurons. *J. Mol. Neurosci.* **2008**, *34*, 77–87. <https://doi.org/10.1007/s12031-007-9002-1>.
92. Zhang, X.; Rojas, J. C.; & Gonzalez-Lima, F. Methylene blue prevents neurodegeneration caused by rotenone in the retina. *Neurotox Res.* **2006**, *9*, 47–57. doi: 10.1007/BF03033307
93. Rojas, J.C.; John, J.M.; Lee, J.; Gonzalez-Lima, F. Methylene Blue Provides Behavioral and Metabolic Neuroprotection Against Optic Neuropathy. *Neurotox. Res.* **2009**, *15*, 260–273. <https://doi.org/10.1007/s12640-009-9027-z>.
94. Wang, C.; McInnis, J.; West, J.B.; Bao, J.; Anastasio, N.; Guidry, J.A.; Ye, Y.; Salvemini, D.; Johnson, K.M. Blockade of Phencyclidine-Induced Cortical Apoptosis and Deficits in Prepulse Inhibition by M40403, a Superoxide Dismutase Mimetic. *J. Pharmacol. Exp. Ther.* **2003**, *304*, 266–271. <https://doi.org/10.1124/jpet.102.041798>.
95. Bonelli, R. M.; Hödl, A. K.; Hofmann, P.; & Kapfhammer, H. P. Neuroprotection in Huntington's disease: a 2-year study on minocycline. *Int Clin Psychopharmacol.* **2004**, *19*, 337–42. doi: 10.1097/00004850-200411000-00004.
96. Miyaoka, T.; Yasukawa, R.; Yasuda, H.; Hayashida, M.; Inagaki, T.; & Horiguchi, J. Minocycline as adjunctive therapy for schizophrenia: an open-label study. *Clin Neuropharmacol.* **2008**, *31*, 287–92. doi: 10.1097/WNF.0b013e3181593d45.
97. Månsson, R.; Hansson, M. J.; Morota, S.; Uchino, H.; Ekdahl, C. T.; & Elmer, E. Re-evaluation of mitochondrial permeability transition as a primary neuroprotective target of minocycline. *Neurobiol Dis.* **2007**, *25*, 198–205. doi: 10.1016/j.nbd.2006.09.008.
98. Kumar, S.N.K.; Deepthy, J.; Saraswathi, U.; Thangarajeswari, M.; Kanna, S.Y.; Ezhil, P.; Kalaiselvi, P. *Morinda citrifolia* mitigates rotenone-induced striatal neuronal loss in male Sprague-Dawley rats by preventing mitochondrial pathway of intrinsic apoptosis. *Redox Rep.* **2017**, *22*, 418–429. <https://doi.org/10.1080/13510002.2016.1253449>.
99. Gopinath, K.; Prakash, D.; & Sudhandiran, G. Neuroprotective effect of naringin, a dietary flavonoid against 3-nitropropionic acid-induced neuronal apoptosis. *Neurochem Int.* **2011**, *59*, 1066–73. doi: 10.1016/j.neuint.2011.08.022.
100. Liu, W.-B.; Zhou, J.; Qu, Y.; Li, X.; Lu, C.-T.; Xie, K.-L.; Sun, X.-L.; Fei, Z. Neuroprotective effect of osthole on MPP+-induced cytotoxicity in PC12 cells via inhibition of mitochondrial dysfunction and ROS production. *Neurochem. Int.* **2010**, *57*, 206–215. <https://doi.org/10.1016/j.neuint.2010.05.011>.
101. De Sarno, P.; Shestopal, S.A.; King, T.D.; Zmijewska, A.; Song, L.; Jope, R.S. Muscarinic Receptor Activation Protects Cells from Apoptotic Effects of DNA Damage, Oxidative Stress, and Mitochondrial Inhibition. *J. Biol. Chem.* **2003**, *278*, 11086–11093. <https://doi.org/10.1074/jbc.M212157200>.
102. Dong, H.; Li, R.; Yu, C.; Xu, T.; Zhang, X.; Dong, M. Paeoniflorin inhibition of 6-hydroxydopamine-induced apoptosis in PC12 cells via suppressing reactive oxygen species-mediated PKC $\delta$ /NF- $\kappa$ B pathway. *Neuroscience* **2015**, *285*, 70–80. <https://doi.org/10.1016/j.neuroscience.2014.11.008>.
103. Wang, D.; Wong, H. K.; Feng, Y. B.; & Zhang, Z. J. Paeoniflorin, a natural neuroprotective agent, modulates multiple anti-apoptotic and pro-apoptotic pathways in differentiated PC12 cells. *Cell Mol Neurobiol.* **2013**, *33*, 521–529. doi: 10.1007/s10571-013-9914-y.
104. Sanz, E.; Quintana, A.; Battaglia, V.; Toninello, A.; Hidalgo, J.; Ambrosio, S.; Valoti, M.; Marco, J.L.; Tipton, K.F.; Unzeta, M. Anti-apoptotic effect of Mao-B inhibitor PF9601N [N-(2-propynyl)-2-(5-benzyloxy-indolyl) methylamine] is mediated by p53 pathway inhibition in MPP+-treated SH-SY5Y human dopaminergic cells. *J. Neurochem.* **2008**, *105*, 2404–2417. <https://doi.org/10.1111/j.1471-4159.2008.05326.x>.
105. Hong, S.-Y.; Jeong, W.-S.; Jun, M. Protective Effects of the Key Compounds Isolated from Corni fructus against  $\beta$ -Amyloid-Induced Neurotoxicity in PC12 Cells. *Molecules* **2012**, *17*, 10831–10845. <https://doi.org/10.3390/molecules170910831>.
106. Yang, L.; Sugama, S.; Mischak, R.P.; Kiaei, M.; Bizat, N.; Brouillet, E.; Joh, T.H.; Beal, M.F. A novel systemically active caspase inhibitor attenuates the toxicities of MPTP, malonate, and 3NP in vivo. *Neurobiol. Dis.* **2004**, *17*, 250–259. <https://doi.org/10.1016/j.nbd.2004.07.021>.

107. Dionne, K.R.; Leser, J.S.; Lorenzen, K.A.; Beckham, J.D.; Tyler, K.L. A brain slice culture model of viral encephalitis reveals an innate CNS cytokine response profile and the therapeutic potential of caspase inhibition. *Exp. Neurol.* **2011**, *228*, 222–231. <https://doi.org/10.1016/j.expneurol.2011.01.006>.
108. Wu, J.; Wang, Y.; Liang, S.; Ma, H. Cytoprotective effect of selective small-molecule caspase inhibitors against staurosporine-induced apoptosis. *Drug Des Devel Ther.* **2014**, *8*, 583–600. doi: 10.2147/DDDT.S60283.
109. Sifringer, M.; Bendix, I.; Borner, C.; Endesfelder, S.; Von Haefen, C.; Kalb, A.; Holifanjaniaina, S.; Prager, S.; Schlager, G.W.; Keller, M.; et al. Prevention of neonatal oxygen-induced brain damage by reduction of intrinsic apoptosis. *Cell Death Dis.* **2012**, *3*, e250. <https://doi.org/10.1038/cddis.2011.133>.
110. Lee, C.S.; Han, E.S.; Han, Y.S.; Bang, H. Differential effect of calmodulin antagonists on MG132-induced mitochondrial dysfunction and cell death in PC12 cells. *Brain Res. Bull.* **2005**, *67*, 225–234. <https://doi.org/10.1016/j.brainresbull.2005.07.003>.
111. Rahimian, R.; Fakhfouri, G.; Ejtemaei Mehr, S.; Ghia, J. E., Genazzani, A. A., Payandemehr, B., Dehpour, A. R., Mousavizadeh, K., & Lim, D. Tropisetron attenuates amyloid-beta-induced inflammatory and apoptotic responses in rats. *Eur J Clin Invest.* **2013**, *43*, 1039–51. doi: 10.1111/eci.12141.
112. Kim, I.S.; Choi, D.-K.; Jung, H.J. Neuroprotective Effects of Vanillyl Alcohol in *Gastrodia elata* Blume Through Suppression of Oxidative Stress and Anti-Apoptotic Activity in Toxin-Induced Dopaminergic MN9D Cells. *Molecules* **2011**, *16*, 5349–5361. <https://doi.org/10.3390/molecules16075349>.
113. Inoue, H.; Tsukita, K.; Iwasato, T.; Suzuki, Y.; Tomioka, M.; Tateno, M.; Nagao, M.; Kawata, A.; Saido, T. C.; Miura, M.; Misawa, H.; Itohara, S., & Takahashi, R. The crucial role of caspase-9 in the disease progression of a transgenic ALS mouse model. *EMBO J.* **2003**, *22*, 6665–74. doi: 10.1093/emboj/cdg634.
114. Bizat, N.; Galas, M. C.; Jacquard, C.; Boyer, F.; Hermel, J. M.; Schiffmann, S. N.; Hantraye, P.; Blum, D., & Brouillet, E. Neuroprotective effect of zVAD against the neurotoxin 3-nitropropionic acid involves inhibition of calpain. *Neuropharmacology.* **2005**, *49*, 695–702. doi: 10.1016/j.neuropharm.2005.04.030.
115. Perche, O.; Doly, M.; Ranchon-Cole, I. Transient protective effect of caspase inhibitors in RCS rat. *Exp. Eye Res.* **2008**, *86*, 519–527. <https://doi.org/10.1016/j.exer.2007.12.005>.
116. Cutillas, B.; Espejo, M.; Gil, J.; Ferrer, I.; Ambrosio, S. Caspase inhibition protects nigral neurons against 6-OHDA-induced retrograde degeneration. *Neuroreport* **1999**, *10*, 2605–2608. <https://doi.org/10.1097/00001756-199908200-00030>.
117. Chen, W.-F.; Chakraborty, C.; Sung, C.-S.; Feng, C.-W.; Jean, Y.-H.; Lin, Y.-Y.; Hung, H.-C.; Huang, T.-Y.; Huang, S.-Y.; Su, T.-M.; et al. Neuroprotection by marine-derived compound, 11-dehydrosinulariolide, in an in vitro Parkinson's model: A promising candidate for the treatment of Parkinson's disease. *Naunyn-Schmiedeberg's Arch. Pharmacol.* **2012**, *385*, 265–275. <https://doi.org/10.1007/s00210-011-0710-2>.
118. Bozzatello, P.; Brignolo, E.; De Grandi, E.; Bellino, S. Supplementation with Omega-3 Fatty Acids in Psychiatric Disorders: A Review of Literature Data. *J. Clin. Med.* **2016**, *5*, 67. <https://doi.org/10.3390/jcm5080067>.
119. Erythropoietin for Cognitive Deficits Associated with Schizophrenia, Bipolar Disorder, and Major Depression: A Systematic Review. *Pharmacopsychiatry.* **2018**, *51*, 100–104. doi: 10.1055/s-0043-114670.
120. Weiser, M.; Levi, L.; Zamora, D.; Biegon, A.; SanGiovanni, J. P.; Davidson, M.; Burshtein, S.; Gonen, I.; Radu, P.; Slobozean Pavalache, K.; Nastas, I.; Hemi, R.; Ryan, T., & Davis, J. M. Effect of Adjunctive Estradiol on Schizophrenia Among Women of Childbearing Age: A Randomized Clinical Trial. *JAMA Psychiatry.* **2019**, *76*, 1009–1017. doi: 10.1001/jamapsychiatry.2019.1842.
121. Schwartz, D.L. Quercetin as an Augmentation Agent in Schizophrenia. *J Clin Psychopharmacol.* **2016**, *36*, 282–3. doi: 10.1097/JCP.0000000000000498.
122. Ben-Azu, B.; Aderibigbe, A.O.; Omogbiya, I.A.; Ajayi, A.M.; Iwalewa, E.O. Morin Pretreatment Attenuates Schizophrenia-Like Behaviors in Experimental Animal Models. *Drug Res.* **2018**, *68*, 159–167. <https://doi.org/10.1055/s-0043-119127>.
123. Morera-Fumero, A.L.; Abreu-Gonzalez, P. Diazepam Discontinuation Through Agomelatine in Schizophrenia With Insomnia and Depression. *J. Clin. Psychopharmacol.* **2010**, *30*, 739–741. <https://doi.org/10.1097/jcp.0b013e3181fbbb7d>.
124. Shamir, E.; Laudon, M.; Barak, Y.; Anis, Y.; Rotenberg, V.; Elizur, A.; Zisapel, N. Melatonin Improves Sleep Quality of Patients With Chronic Schizophrenia. *J. Clin. Psychiatry* **2000**, *61*, 373–377. <https://doi.org/10.4088/jcp.v61n0509>.
125. Shamir, E.; Barak, Y.; Shalman, I.; Laudon, M.; Zisapel, N.; Tarrasch, R.; Elizur, A.; Weizman, R. Melatonin Treatment for Tardive Dyskinesia: A double-blind, placebo-controlled, crossover study. *Arch. Gen. Psychiatry* **2001**, *58*, 1049–1052. <https://doi.org/10.1001/archpsyc.58.11.1049>.
126. Hassanpour, F.; Zarghami, M.; Mouodi, S.; Moosazadeh, M.; Barzegar, F.; Bagheri, M.; Hendouei, N. Adjunctive Memantine Treatment of Schizophrenia: A Double-Blind, Randomized Placebo-Controlled Study. *J. Clin. Psychopharmacol.* **2019**, *39*, 634–638. <https://doi.org/10.1097/jcp.0000000000001115>.
127. Zhang, L.; Zheng, H.; Wu, R.; Kosten, T. R.; Zhang, X. Y., & Zhao, J. The effect of minocycline on amelioration of cognitive deficits and pro-inflammatory cytokines levels in patients with schizophrenia. *Schizophr Res.* **2019**, *212*, 92–98. doi: 10.1016/j.schres.2019.08.005.
128. Sepehrmanesh, Z.; Heidary, M.; Akasheh, N.; Akbari, H.; Heidary, M. Therapeutic effect of adjunctive N-acetyl cysteine (NAC) on symptoms of chronic schizophrenia: A double-blind, randomized clinical trial. *Prog. Neuro-Psychopharmacol. Biol. Psychiatry* **2018**, *82*, 289–296. <https://doi.org/10.1016/j.pnpbp.2017.11.001>.

- 
129. Park, J.H.; Kang, S.-S.; Kim, J.Y.; Tchah, H. The Antioxidant N-Acetylcysteine Inhibits Inflammatory and Apoptotic Processes in Human Conjunctival Epithelial Cells in a High-Glucose Environment. *Investig. Ophthalmology Vis. Sci.* **2015**, *56*, 5614–5621. <https://doi.org/10.1167/iovs.15-16909>.
  130. A Wittkopp, T.; Abuzzahab, F.S. Nicotinic acid and nicotinamide adenine dinucleotide (NAD) therapy in schizophrenia: A review. *Behav. Neuropsychiatry* **1972**, *4*, 6–12.
  131. Lerner, V.; Miodownik, C.; Gibel, A.; Sirota, P.; Bush, I.; Elliot, H.; Benatov, R.; Ritsner, M.S. The Retinoid X Receptor Agonist Bexarotene Relieves Positive Symptoms of Schizophrenia. *J. Clin. Psychiatry* **2013**, *74*, 1224–1232. <https://doi.org/10.4088/jcp.12m08160>.
  132. Goff, D. C., Cather, C., Freudenreich, O., Henderson, D. C., Evins, A. E., Culhane, M. A., & Walsh, J. P. A placebo-controlled study of sildenafil effects on cognition in schizophrenia. *Psychopharmacology* **2009**, *202*, 411–7. doi: 10.1007/s00213-008-1278-5
  133. Dakhale, G.N.; Khanzode, S.D.; Saoji, A. Supplementation of vitamin C with atypical antipsychotics reduces oxidative stress and improves the outcome of schizophrenia. *Psychopharmacology* **2005**, *182*, 494–498. <https://doi.org/10.1007/s00213-005-0117-1>.
  134. Hoffer, L.J. Vitamin therapy in schizophrenia. *Isr. J. Psychiatry Relat. Sci.* **2008**, *45*, 3–10.
  135. Sandyk, R.; Kanofsky, J.D. Vitamin C in the Treatment of Schizophrenia. *Int. J. Neurosci.* **1993**, *68*, 67–71. <https://doi.org/10.3109/00207459308994261>
